# Supplementary material for: Anxiety and depressive symptoms are associated with poor sleep health during a period of COVID-19-induced nationwide lockdown: a cross-sectional analysis of adults in Jordan
Source: PubMed Central journal article supplement — BMJ Open. 2020 Dec 22;10(12):e041995. doi: 10.1136/bmjopen-2020-041995 (PMC7757395; doi:10.1136/bmjopen-2020-041995), 2020-12-22
Supplement: bmjopen-2020-041995.draft_revisions.pdf [file bmjopen-2020-041995.draft_revisions.pdf]

# BMJ Open

BMJ Open is committed to open peer review. As part of this commitment we make the peer review history of every article we publish publicly available.

When an article is published we post the peer reviewers' comments and the authors' responses online. We also post the versions of the paper that were used during peer review. These are the versions that the peer review comments apply to.

The versions of the paper that follow are the versions that were submitted during the peer review process. They are not the versions of record or the final published versions. They should not be cited or distributed as the published version of this manuscript.

BMJ Open is an open access journal and the full, final, typeset and author-corrected version of record of the manuscript is available on our site with no access controls, subscription charges or pay-per-view fees (<http://bmjopen.bmj.com>).

If you have any questions on BMJ Open's open peer review process please email [info.bmjopen@bmj.com](mailto:info.bmjopen@bmj.com)

# BMJ Open

## Anxiety and Depressive Symptoms are Associated with Poor Sleep Health During a Period of COVID-19 Induced Nationwide Lockdown: A Cross-Sectional Analysis of Adults in The Middle East

|                               |                                                                                                                                                                                                                                                                                                                                                                                                                                                                                                                                                                                                                                                             |
|-------------------------------|-------------------------------------------------------------------------------------------------------------------------------------------------------------------------------------------------------------------------------------------------------------------------------------------------------------------------------------------------------------------------------------------------------------------------------------------------------------------------------------------------------------------------------------------------------------------------------------------------------------------------------------------------------------|
| Journal:                      | <i>BMJ Open</i>                                                                                                                                                                                                                                                                                                                                                                                                                                                                                                                                                                                                                                             |
| Manuscript ID                 | bmjopen-2020-041995                                                                                                                                                                                                                                                                                                                                                                                                                                                                                                                                                                                                                                         |
| Article Type:                 | Original research                                                                                                                                                                                                                                                                                                                                                                                                                                                                                                                                                                                                                                           |
| Date Submitted by the Author: | 25-Jun-2020                                                                                                                                                                                                                                                                                                                                                                                                                                                                                                                                                                                                                                                 |
| Complete List of Authors:     | Al-Ajlouni, Yazan; Cambridge University, Department of Primary Care and Public Health<br>Park, Su Hyun; Columbia University Mailman School of Public Health, Department of Epidemiology<br>Alawa, Jude; University of Cambridge, Institute of Public Health<br>Shamaileh, Ghaith; Tulane University School of Science and Engineering, Department of Cell and Molecular Biology<br>Bawab, Aziz; Presbyterian Hospital<br>El-Sadr, Wafaa M.; ICAP at Columbia University; Columbia University Mailman School of Public Health, Department of Epidemiology<br>Duncan, Dustin; Columbia University Mailman School of Public Health, Department of Epidemiology |
| Keywords:                     | MENTAL HEALTH, INFECTIOUS DISEASES, SLEEP MEDICINE, PUBLIC HEALTH                                                                                                                                                                                                                                                                                                                                                                                                                                                                                                                                                                                           |
|                               |                                                                                                                                                                                                                                                                                                                                                                                                                                                                                                                                                                                                                                                             |

SCHOLARONE™  
Manuscripts

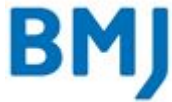

I, the Submitting Author has the right to grant and does grant on behalf of all authors of the Work (as defined in the below author licence), an exclusive licence and/or a non-exclusive licence for contributions from authors who are: i) UK Crown employees; ii) where BMJ has agreed a CC-BY licence shall apply, and/or iii) in accordance with the terms applicable for US Federal Government officers or employees acting as part of their official duties; on a worldwide, perpetual, irrevocable, royalty-free basis to BMJ Publishing Group Ltd ("BMJ") its licensees and where the relevant Journal is co-owned by BMJ to the co-owners of the Journal, to publish the Work in this journal and any other BMJ products and to exploit all rights, as set out in our [licence](#).

The Submitting Author accepts and understands that any supply made under these terms is made by BMJ to the Submitting Author unless you are acting as an employee on behalf of your employer or a postgraduate student of an affiliated institution which is paying any applicable article publishing charge ("APC") for Open Access articles. Where the Submitting Author wishes to make the Work available on an Open Access basis (and intends to pay the relevant APC), the terms of reuse of such Open Access shall be governed by a Creative Commons licence – details of these licences and which [Creative Commons](#) licence will apply to this Work are set out in our licence referred to above.

Other than as permitted in any relevant BMJ Author's Self Archiving Policies, I confirm this Work has not been accepted for publication elsewhere, is not being considered for publication elsewhere and does not duplicate material already published. I confirm all authors consent to publication of this Work and authorise the granting of this licence.

Manuscript Word Count: 3846

**Anxiety and Depressive Symptoms are Associated with Poor Sleep Health  
During a Period of COVID-19 Induced Nation-wide Lockdown: A Cross-  
Sectional Analysis of Adults in The Middle East**

Yazan A. Al-Ajlouni, BS<sup>1, 2</sup>  
Su Hyun Park, PhD, MPH<sup>1</sup>  
Jude Alawa, BA<sup>2</sup>  
Ghaith Shamaileh<sup>3</sup>  
Aziz Bawab, MD<sup>4</sup>  
Wafaa El-Sadr, MD, MPH, MPA<sup>1, 5</sup>  
Dustin T. Duncan, ScD<sup>1</sup>

1. Department of Epidemiology, Columbia University Mailman School of Public Health,  
New York, NY USA
2. Cambridge Institute of Public Health, University of Cambridge School of Clinical  
Medicine, Cambridge, United Kingdom
3. Department of Cell and Molecular Biology, Tulane University School of Science and  
Engineering, New Orleans, Louisiana USA
4. NY-Presbyterian Hospital, New York, NY USA
5. ICAP at Columbia University, New York, NY. USA

**Correspondence to:** Yazan A. Al-Ajlouni, BS, University of Cambridge School of  
Clinical Medicine, Department of Primary Care and Public Health, Cambridge, United  
Kingdom, CB1 2EW. Tel: (+44) 74233 Email: [ya295@cam.ac.uk](mailto:ya295@cam.ac.uk)

## Abstract

**Background:** Previous research demonstrated increased prevalence of negative mental health outcomes during epidemics, and it is suggested that extended states of lock-down further heighten mental health outcomes. Jordan, a Middle Eastern country, declared a state of national emergency due to the novel coronavirus (COVID-19) and a strict nation-wide lockdown on March 17, 2020, banning all travel and movement around the country, potentially impacting mental health. This study sought to investigate the association between mental health (i.e., anxiety and depressive symptoms) and sleep health among a sample of Jordanians living through a state of COVID-19 induced nation-wide lockdown.

**Methods:** Using Facebook, participants in Jordan in March 2020 were recruited and direct to a web-based survey measuring anxiety, depressive symptoms, sleep health, and demographics. A modified Poisson regression model with robust error variance Adjusted prevalence ratios (aPRs) and 95% confidence intervals (CIs) were estimated to examine how anxiety and depressive symptoms may affect different dimensions of sleep health: 1) poor sleep quality, 2) short sleep duration, 3) encountering sleep problems.

**Results:** Anxiety was associated with poor sleep health outcomes. For example, corresponding to the dose-response relationship between anxiety and sleep health outcomes, those reporting severe anxiety were the most likely to experience poor sleep quality (aPR = 9.24; 95% CI = 6.35–13.46), short sleep duration (aPR = 2.25; 95% CI = 1.93–2.63), and at least one problem sleep problem (aPR = 1.76; 95% CI = 1.56–1.98). Moreover, depressive symptoms were also associated with poor sleep health outcomes. As compared to scoring in the first quartile, scoring in the second, third, and fourth quartile was associated with poor sleep quality (aPRs = 2.24, 5.44, and 12.38, respectively), short sleep duration (aPRs = 1.22, 1.42, and 1.90, respectively), and experiencing at least one sleep problem (aPRs = 1.41, 1.64, and 1.95, respectively).

**Conclusions:** Increased levels of anxiety and depressive symptoms can negatively influence sleep health among a sample of Jordanian adults living in a state of COVID-19 induced nation-wide lockdown.

### Strengths and Limitations of this study

- This study utilized a relatively large sample for a population that is heavily understudied in public health research.
- To the best of our knowledge, this is the first study to examine this association among a Middle Eastern population and one of the first to investigate the impact of an extremely strict extended lockdown on health outcomes.
- The reliance of subjective measures for both the exposure and the outcome may have introduced bias.
- The generalizability of the results is an acknowledged concern given that participants were Jordanian using the social media platform, Facebook

**Keywords:** Coronavirus; COVID-19; Lockdown; Outbreak Control; Mental Health; Sleep Health

## Introduction

On December 31, 2019, a pneumonia of unknown cause was first detected in Wuhan, the largest metropolitan area in China's Hubei province, and was reported to the World Health Organization (WHO) Country Office in China. A month later, the coronavirus (COVID-19) outbreak was declared as a public health emergency of international concern by the WHO. On March 2, 2020, Jordan detected its first COVID-19 case in the country. On March 11, 2020, as the number of COVID-19 cases outside China continued to increase, resulting in over 4,000 deaths at the time, WHO declared the COVID-19 a pandemic<sup>1,2</sup>.

As the COVID-19 pandemic continued to unfold across the world, Jordan began detecting tens of cases, and decided to impose some of the strictest measures to combat an outbreak. On March 14, 2020, a travel ban was issued, and all borders in Jordan were blocked. Few days after, a strict nation-wide lockdown was implemented, and residents were not allowed on the streets<sup>3</sup>. Although lockdown ended in Wuhan, China on April 8, 2020 after 76 days of being implemented<sup>4</sup>, Jordanians continued to live under some of the strictest measures of a lockdown for nearly two months until early May 2020. This included allowing some movement outside households for some days of the week while completely disallowing such movement on other days. Additionally, all parks, restaurants, cafes, and any public open spaces were shut down indefinitely. Groceries were only available through delivery to households, and no cars could be driven on the streets in all regions of the country.

While a lockdown is considered a recommended measure in combating an outbreak, an extended lockdown may have severe effects on people's social lives, mobility, and the overall economy<sup>5</sup>. This includes influencing a set of health outcomes among the general population and could be an activator of stressors, such as anxiety, and several other symptoms of poor mental health<sup>6-9</sup>. In the context of a prolonged strict lockdown measures, large-scale social isolation is also induced among the population. In Jordan, a large proportion of the population is employed in working-class jobs, such as those in the industrial or agricultural sectors, which require manual labor and typically offer low pay. The lockdown has left many Jordanians unemployed and without the daily income they depend on, imposing significant financial stress. For instance, in a report demonstrating the impact of lockdown in Jordan on households across the country, three-quarters of respondents (72.5%), among a sample of 12,084 Jordanian adults, indicated having difficulties covering basic needs (rent, food, heating and medicine) due to the lockdown measures<sup>3</sup>. Additionally, 63.3% indicated that they did not have a source of support in case they run out of food and basic amenities required for survival<sup>3</sup>.

In general, previous research has consistently demonstrated that poor mental health is associated with multiple negative health outcomes, including poor sleep health<sup>6-9</sup>. The *Diagnostic and Statistical Manual of Mental Disorders 5<sup>th</sup> Edition*, widely used by psychiatrists across the globe, lists sleep disturbance as one of the possible symptoms required for the diagnosis of both major depressive disorder and generalized anxiety disorder. Negative mental health outcomes may be heightened in epidemics, such as during the COVID-19 pandemic<sup>10</sup>. For instance, Wang et al. demonstrated that the

1  
2  
3 COVID-19 pandemic and the restriction of freedom during lockdowns has been shown to  
4 have a significant psychological impact related to stress, depression and anxiety<sup>11</sup>.  
5 Additionally, Brooks et al., reported that such psychosocial health outcomes (e.g., stress,  
6 anger, and fear) could be further increased during the state epidemic-induced  
7 lockdowns<sup>12</sup>.  
8

9  
10 Despite there being an abundance of literature on the prevalence of mental health issues  
11 during the times of epidemics, as well as its relationship with sleep health among various  
12 populations<sup>6-10,13-15</sup>, few studies have investigated such an association during times of  
13 nation-wide lockdowns, especially in the Middle East. While lockdown measures could be  
14 effective in controlling the transmission of infection, such measures could influence other  
15 health outcomes unrelated to their current outbreak. Research has shown that sleep and  
16 the circadian system exert a strong regulatory influence on immune functions<sup>16</sup>. Sleep  
17 and the circadian system cooperate bidirectionally at the systemic and cellular level to  
18 organize immune functions in time and space via neuroendocrine and sympathetic  
19 effector mechanisms<sup>17-20</sup>. The relationship between sleep health and the immune system  
20 is particularly of importance during times of epidemics. For example, Prather et al.  
21 showed that among a sample of 164 healthy men and women, shorter sleep duration,  
22 measured behaviorally using actigraphy prior to viral exposure, was associated with  
23 increased susceptibility to the common cold<sup>21</sup>.  
24  
25

26 In this study, we sought to investigate the associations between mental health issues,  
27 including anxiety and depressive symptoms, with poor sleep health among a sample of  
28 individuals residing in Jordan during a period of COVID-19 pandemic induced lockdown.  
29 This study is one of the first to examine associations between mental health and sleep  
30 health in The Middle East. We hypothesized that anxiety and depressive symptoms are  
31 associated with a higher risk of poor sleep health among a sample of Jordanians, after  
32 controlling for demographic covariates.  
33  
34

## 35 **Methodology**

### 36 ***Data and Study Sample***

37  
38  
39 Facebook, a social media platform, was utilized to recruit a sample of individuals across  
40 Jordan during a period of nation-wide lockdown put in place due to the COVID-19  
41 pandemic outbreak in March 2020. A post was placed on Facebook targeting Jordanians  
42 between the ages of 18 – 65 years old who were in Jordan for the duration of the last two  
43 weeks of March 2020. The survey was administered through Qualtrics, a platform for  
44 survey administration previously used in health research<sup>22</sup>. The survey was available to  
45 participants in both English and Arabic languages. The survey was originally written in  
46 English, and then translated independently by three bilingual researchers to Arabic. The  
47 survey was then piloted for readability and clarity among both English and Arabic  
48 speakers. The post was advertised for a period of four consecutive days and included  
49 assessment of eligibility and a total of 30 items including demographics and measures for  
50 various constructs. These included anxiety, depressive symptoms, and sleep health.  
51 Measures were taken to avoid duplicate answers by utilizing the “prevent ballot box  
52 stuffing” feature on Qualtrics. Additionally, internal protocol (IP) addresses associated  
53  
54  
55  
56  
57  
58  
59  
60

with responses were reviewed manually to ensure no duplicates were recorded. On average, the survey took 7 minutes for completion.

Overall, 3,462 participants clicked on the link and were redirected to the survey, of which 2,202 participants were eligible to participate. A total of 1,240 full responses were recorded, corresponding to a completion rate of 56.4% among those deemed eligible. Approximately, 67.4% of the respondents completed the survey in Arabic. Overall, the completion rate of those who clicked the link to the survey was 36.5%. All protocols and procedures were approved by the University of Jordan Hospital Institutional Review Board prior to data collection.

## Measures

### *Demographics*

Four items were included to measure demographic variables among participants. Participants were asked to report their age (in years), gender (male or female), employment status (employed, self-employed, unemployed, student, or retired), and the city they currently reside in within Jordan. Cities were grouped into the following regions: Northern region (Irbid, Jerash, Balqa'a, Zarqa, Ajloun, and Mafraq), Central Region (Amman, Madaba, and Salt), Southern Region (Tafila, Karak, Ma'an, Aqaba, and Petra)

### *Anxiety*

The General Anxiety Disorder 7-item (GAD-7) scale was used to measure anxiety among participants. The GAD-7 was developed to diagnose generalized anxiety disorders and has been validated in 2,740 primary-care patients<sup>23</sup>. Seven items were included in the survey, and participants' anxiety was determined according to their scoring on the item. A 7-item questionnaire was utilized where each item asked participants how often, during the last 2 weeks, they were bothered by a given symptom. Response options were "not at all," "several days," "more than half the days," and "nearly every day," scored as 0, 1, 2, and 3, respectively. Scores range from 0 to 21, with four categorizations of anxiety severity according to the score. Those who score between 0 to 4 were considered to have minimal anxiety, while those scoring between 5-9, 10-14, and 15-21 were noted to have mild, moderate, and severe anxiety, respectively. Cronbach's alpha was 0.87, indicating good internal consistency.

### *Depressive Symptoms*

Ten (10) items were adopted from the Center for Epidemiologic Studies Depression Scale (CES-D). Those items were chosen to be consistent with cultural concerns regarding the topic of depression and to be appropriate when translated to the Arabic language. Response options were "rarely or none of the time (<1 day)", "some or a little of the time (1-2 days)", "occasionally or a moderate amount of time (3-4 days)", and "most or all of the time (5-7 days)", scored as 0,1,2, and 3, respectively. Three items worded in the positive direction were reverse coded and all items were summed for a total score, with



1  
2  
3 a possible range of 0-30. During data analysis, the total scores were divided in quartiles:  
4 the first quartile (Q1:0-3), the second quartile (Q2:4-6), the third quartile (Q3: 7-11), and  
5 the fourth quartile (Q4:12-27). Cronbach's alpha was 0.8145, indicating good internal  
6 consistency.  
7

### 8 9 *Sleep Health*

10  
11 Three items were adopted from the Pittsburgh Sleep Quality Index (PSQI), a reliable and  
12 validated tool<sup>24</sup>, and included in the survey to measure for sleep health outcomes: sleep  
13 quality, sleep duration, and experiencing sleep problems. Sleep quality was measured  
14 using the item "During the past month, how would you rate your sleep quality overall?"<sup>25</sup>.  
15 Participants were asked to choose one of four options, including "Very good", "Fairly  
16 good", "Fairly bad", and "Very bad". Consistent with previous research on sleep health<sup>26-</sup>  
17 <sup>29</sup>, the four response options were dichotomized in statistical analysis good sleep quality  
18 (e.g., includes "very good" and "fairly good") and poor sleep quality (e.g., includes "very  
19 bad" and "fairly bad"). To measure sleep duration, we used the question asking, "During  
20 the past month, how many h of actual sleep did you get each night? (This may be different  
21 from the number of hours you spent in bed.)"<sup>25</sup>. Participants then reported their response  
22 in hours as integers with one decimal place allowed (e.g., halves). Short sleep duration  
23 was defined as 7 hours or less<sup>26,30,31</sup>. Finally, sleep problems were assessed by asking  
24 the participants if they experienced any of three sleep-related problems in the past two  
25 weeks (e.g., the period of lock-down). Three statements were presented, and participants  
26 were given a "Yes" or "No" response options. These statements were "1) "I had trouble  
27 sleeping because I could not get to sleep within 30 min." (i.e., problems falling asleep) 2).  
28 "I had trouble staying awake while driving, eating meals, or engaging in social activity."  
29 (i.e., problems staying awake in the daytime also known as daytime sleepiness) 3) "I took  
30 medicine (prescribed or "over the counter") to help me sleep"<sup>27</sup>  
31  
32  
33  
34

### 35 36 *Statistical Analysis*

37  
38 The study population included individuals aged 18 years and older (n = 1,240).  
39 Descriptive statistics (frequencies, percentages) were calculated for demographic  
40 characteristics, anxiety, and depression according to sleep health outcomes (poor sleep  
41 quality, short sleep duration, and experiencing sleep problems). Chi-square or Fisher's  
42 exact tests were used to examine the differences in demographic characteristics, anxiety,  
43 and depression between those with and without each sleep health outcome.  
44

45  
46 The association between anxiety, depression, and each poor sleep outcome was  
47 assessed using a modified Poisson regression model with robust error variance. The  
48 multivariable analysis adjusted for age, gender, employment status, and region. Adjusted  
49 prevalence ratios (aPRs) and 95% confidence intervals (CIs) were estimated. P-values  
50 for trend were calculated using logistic regression. Two-sided  $p < 0.05$  was considered  
51 statistically significant. Data were analyzed using Stata 16.0 (StataCorp, College Station,  
52 TX, USA).  
53  
54  
55  
56  
57  
58  
59  
60

## Results

Table 1 presents the participants sociodemographic characteristics, anxiety, and depressive symptoms according to sleep health outcomes. The mean age was 37.35 (SD = 11.01), with over 60% of our sample aged less than 40 years old. Approximately half of the sample (52.9%) were males. Additionally, more than three quarters of the participants reported residing in the Central region (78.2%), followed by the Northern region (19.1%). Most of the participants were either employed (54.3%) or self-employed (16.5%), while 17.6% reported being unemployed or 4.6% were retired at the current time. In terms of anxiety, 53% of the participants reported symptoms for mild (33.8%), moderate (12.9%), or severe anxiety (6.3%) during the period of national lockdown. Furthermore, approximately a quarter of our sample scored in each of the four quartiles for the depressive symptoms measures (e.g., 26.9% in the lowest quartile, 24.8% in the second quartile, 26.8% in the third quartile, and 21.5% in the highest quartile). Finally, and when measuring for sleep health outcomes, 17.9% of the participants reported poor sleep quality, 46.8% reported short sleep duration (equal or less than 7 hours of sleep on average for every night over the past week), while 63.7% reported experiencing at least one sleep problem over the past week.

Multivariable regressions with 95% confidence intervals were calculated to investigate the relationship between anxiety, depressive symptoms, and sleep health outcomes. The results, after adjusting for sociodemographic covariates, are presented in Table 2. Anxiety was associated with poor sleep health outcomes. Results demonstrated a dose-response relationship, as the aPRs for poor sleep health increased with increasing levels of both anxiety and depressive symptoms. Compared to those who reported minimal anxiety, participants reporting mild anxiety were more likely to experience poor sleep quality (aPR = 3.10; 95% CI = 2.15–4.49), short sleep duration (aPR = 1.36; 95% CI = 1.18–1.57), and at least one problem sleep problem (aPR = 1.43; 95% CI = 1.29–1.58). Similarly, those reporting moderate anxiety were more likely to experience poor sleep quality (aPR = 6.06; 95% CI = 4.17 – 8.82), short sleep duration (aPR = 1.75; 95% CI = 1.49–2.06), and at least one problem sleep problem (aPR = 1.59; 95% CI = 1.42–1.78) compared to those reporting minimal anxiety. Similarly, and corresponding to the dose-response relationship between anxiety and sleep health outcomes, those reporting severe anxiety were the most likely to experience poor sleep quality (aPR = 9.24; 95% CI = 6.35–13.46), short sleep duration (aPR = 2.25; 95% CI = 1.93–2.63), and at least one problem sleep problem (aPR = 1.76; 95% CI = 1.56–1.98). P-trend <0.001 for all sleep outcomes.

Depressive symptoms were also associated with poor sleep health outcomes. This association also demonstrated dose-response relationship. As compared to scoring in the first quartile, scoring in the second, third, and fourth quartile was significantly associated with poor sleep quality (aPRs = 2.24, 5.44, and 12.38, respectively), short sleep duration (aPRs = 1.22, 1.42, and 1.90, respectively), and experiencing at least one sleep problem (aPRs = 1.42, 1.64, and 1.95, respectively).

## Discussion

This study is the first to empirically explore both mental health and sleep health measures during nationwide lockdown in response to the COVID-19 pandemic. It is also the first study to evaluate associations between mental health and sleep health in Jordan, and one of few studies to address the relationship between these measures among a severely understudied population; Middle Eastern adults. To the best of our knowledge, there is only one other study that has assessed sleep health in Jordan, which reported that poor sleep health, including a high risk of obstructive sleep apnea, snoring, and daytime sleepiness, was common among Jordanians attending primary care clinics<sup>32</sup>.

In our study, the majority of participants reported having experienced mild (33.8%), moderate (12.9%), or severe (6.3%) levels of anxiety during lockdown, and nearly half of respondents reported depressive symptoms during lockdown. Similarly, over 60 percent of participants reported having experienced at least one sleep problem in the last week, and nearly half reported having had short sleep duration. In addition, we found that increased levels of reported anxiety or depression were both significantly associated with an increase in poor sleep health outcomes among Jordanians during lockdown in response to the COVID-19 pandemic.

These findings suggest the possible impact that economic, social, or health-related circumstances caused by nation-wide lockdown can have in exacerbating anxiety, depressive symptoms, and poor sleep health among respondents in Jordan. Particular to the context of lockdown in response to the COVID-19 pandemic, the Jordanian government did not provide economic support, financial incentives (e.g., stimulus), or loan forgiveness schemes to support individuals who may have lost significant portions of their income or faced additional financial obligations as a result of lockdown and their inability to engage with their given occupations consistently<sup>3</sup>. As a result, these economic circumstances may have contributed to increased anxiety, reported depressive symptoms, and poor sleep health. While it is expected that these economic circumstances would affect adult men in particular because they are typically considered financial providers for their families in the context of Jordanian culture<sup>33</sup>, reported rates of anxiety, depressive symptoms, and poor sleep health were comparable between male and female respondents. This is the case despite that within Jordan, a larger proportion of men work outside the home than women. That being said, because childcare, elderly care, and housework are typically women's responsibilities in this context, the lockdown restrictions would be expected to disproportionately affect women's economic resilience, mental well-being, and sleep health, especially given rising levels of domestic violence and reduced access to sexual and reproductive health services during lockdown<sup>34,35</sup>. It should be noted that studies have shown that men tend to have a higher prevalence of sleep disorders such as obstructive sleep apnea, other studies have found that women are more likely than men to report an increased burden of depressive symptoms as a result of poor sleep health<sup>36</sup>.

Other factors that have been found to affect sleep health and mental health outcomes that are also expected to be relevant or exacerbated during lockdown situations include tobacco or khat use, daytime sleepiness, atypical work schedules, low levels of physical

1  
2  
3 activity, and violent or poor familial environments in households<sup>37-41</sup>. The increased  
4 recreational screen time during lockdown spent watching television, using a computer, or  
5 utilizing smartphones and the reality of isolation with limited social contact would also be  
6 expected to contribute to poor mental health outcomes, including anxiety and depressive  
7 symptoms, found in our study<sup>41-43</sup>. In addition, unemployment has been noted to be  
8 associated with diminished mental health and is negatively correlated with sleep health  
9 measures<sup>44</sup>. Approximately 25% of unemployed or retired respondents in our study  
10 reported having experienced at least one sleep problem in the last week and short sleep  
11 duration. These risk factors are not only expected to work in tandem but are also expected  
12 to expose underlying vulnerabilities that also contribute to poor mental health and sleep  
13 health.  
14  
15

16  
17 Our findings that increased levels of self-reported anxiety or depression were significantly  
18 associated with an increase in poor sleep health outcomes can potentially be explained  
19 by the relationship between mental health and sleep health. The pathway by which  
20 depression alters sleep is thought to be through the loss of deep, slow-wave sleep and  
21 an increase in nocturnal arousal. The combination of these two effects contributes to a  
22 decrease in non-REM sleep, which may subsequently result in reduced REM sleep  
23 latency<sup>45</sup>. Several studies have shown the association between depression and the  
24 disruption of REM sleep<sup>46,47</sup>. Furthermore, the cause of depression is most commonly  
25 attributed to the dysregulation of monoamines, such as serotonin, dopamine,  
26 norepinephrine, and dopamine. An individual's transition to REM sleep is typically  
27 accompanied by a rapid decrease in these monoamines<sup>48</sup>, and such dysregulation may  
28 be associated with the disruption of REM sleep and the subsequent onset of depressive  
29 symptoms. Research has also demonstrated that depression is correlated with increased  
30 inflammatory markers and that depressive symptoms can be reduced by decreasing that  
31 inflammation<sup>49</sup>. As such, sleep loss has been associated with the increased production of  
32 inflammatory markers, such as C-reactive protein and interleukins<sup>50</sup>. Though the exact  
33 mechanism is not fully understood, there appears to be a relationship between sleep  
34 disturbance, inflammation, and depression<sup>49,51</sup>. Another potential pathway by which sleep  
35 disturbances and depression interact is through alternations in one's circadian rhythm.  
36 An individual's circadian rhythm is crucial to maintaining the sleep-wake cycle, and it has  
37 been observed that depression disrupts circadian rhythm<sup>52</sup>.  
38  
39  
40  
41

42 When evaluating the potential consequences of lockdown during a pandemic such as  
43 COVID-19, it is critical to consider how lockdown may predispose individuals to risk  
44 factors that impact mental health and sleep health. Poor sleep habits, anxiety, and  
45 depression are all recognized as affecting overall health and contributing to a number of  
46 risk factors for cardiovascular disease, obesity, hypertension, hyperlipidemia, and  
47 diabetes, among other chronic conditions that are increasingly prevalent in Jordan<sup>53</sup>.  
48 Similarly, poor mental health and sleep health are also found to be associated with  
49 excessive alcohol use and substance use<sup>6,54</sup>. Given that poor sleep habits, anxiety, and  
50 depression are also associated with decreased immune responsiveness, it is especially  
51 important to consider how the impacts of nation-wide lockdown on sleep health and  
52 mental health may make individuals particularly vulnerable to SARS-CoV-2, the causative  
53 agent of COVID-19, or other highly infectious pathogens<sup>55</sup>.  
54  
55  
56  
57  
58  
59  
60

1  
2  
3  
4 The study findings, the lack of interventions in place to support the population during strict  
5 lockdowns (e.g., financial incentives, mental health resources), and the absence of  
6 discourse to address poor sleep health or mental health as a result of nation-wide  
7 lockdown highlight a gap in policymaking and planning during health emergencies and  
8 disease outbreaks in Jordan and likely in other countries. While the impact of lockdown  
9 on sleep health and mental health is not expected to be unique to Jordan, future research  
10 should focus on further elucidating the determinants of poor sleep health and mental  
11 health during lockdown and exploring the potential interactive impacts of specific risk  
12 factors that are exacerbated during lockdown on mental health and sleep health and their  
13 subsequent effects on susceptibility to disease. Future attention should also focus on  
14 articulating policies and designing interventions to not only address identified  
15 determinants and risk factors but also to uphold an international standard of individuals'  
16 right to health<sup>56</sup>, especially for vulnerable and disadvantaged populations.  
17  
18  
19

### 20 **Limitations**

21  
22 This study's methodology is subject to several limitations. First, the sample population  
23 only includes individuals utilizing one social media platform, which introduces self-  
24 selection and volunteer bias and limits the generalizability of this study. Second, the  
25 information collected using the online survey includes exclusively self-reported data. As  
26 a result, responses, especially those measuring sleep health and mental health, can be  
27 considered subjective, decreasing the reliability of the study findings. Third, because our  
28 analysis did not adjust for additional confounding factors, such as substance use, residual  
29 confounding may have been introduced. Finally, given that this study utilizes a cross-  
30 sectional survey design, it cannot be used to analyze sleep health and mental health  
31 measures over an extended period of time.  
32  
33  
34

### 35 **Conclusions**

36  
37 This study provides evidence of reported anxiety and depressive symptoms and their  
38 association with poor sleep health outcomes during lockdown in Jordan in the face of the  
39 COVID-19 pandemic. Our findings draw attention to the potential negative consequences  
40 of lockdown and their impact on an individual's overall health, emphasizing the need for  
41 public health professionals and governments to not only monitor health profiles during  
42 lockdown but also to create interventions aimed at improving health and well-being,  
43 especially for vulnerable populations. More attention is required to investigate the impacts  
44 of lockdown in exacerbating risk factors for poor mental health and sleep health, and  
45 future interventions and policies should be tailored toward addressing identified risk  
46 factors and improving health outcomes in the context of nation-wide lockdown.  
47  
48  
49  
50  
51  
52  
53  
54  
55  
56  
57  
58  
59  
60

## Acknowledgments

We thank the participants and the translators of this study. Additionally, we thank Fatih Haloglu for assisting with data cleaning for this study. Additionally, we thank local research assistants from the University of Jordan for assisting with the online data collection. No funding was required for this project.

For peer review only

## References

1. Caso V, Federico A. No lockdown for neurological diseases during COVID19 pandemic infection. Springer; 2020.
2. WHO Director-General's opening remarks at the media briefing on COVID-19 - 11 March 2020 [press release]. 2020.
3. UNDP Jordan. *Impact of COVID-19 on Households in Jordan*. May 21, 2020 2020.
4. Lee I, Wang C-C, Lin M-C, Kung C-T, Lan K-C, Lee C-T. Effective strategies to prevent coronavirus disease-2019 (COVID-19) outbreak in hospital. *The Journal of Hospital Infection*. 2020.
5. Shrestha AM, Shrestha UB, Sharma R, Bhattarai S, Tran HNT, Rupakheti M. Lockdown caused by COVID-19 pandemic reduces air pollution in cities worldwide. 2020.
6. Kenney SR, Lac A, LaBrie JW, Hummer JF, Pham A. Mental health, sleep quality, drinking motives, and alcohol-related consequences: a path-analytic model. *Journal of Studies on Alcohol and Drugs*. 2013;74(6):841-851.
7. Tsuno N, Besset A, Ritchie K. Sleep and depression. *The Journal of clinical psychiatry*. 2005.
8. Augner C. Associations of subjective sleep quality with depression score, anxiety, physical symptoms and sleep onset latency in young students. *Central European journal of public health*. 2011;19(2):115-117.
9. Duncan DT, Goedel WC, Mayer KH, et al. Poor sleep health and its association with mental health, substance use, and condomless anal intercourse among gay, bisexual, and other men who have sex with men. *Sleep Health*. 2016;2(4):316-321.
10. Hao F, Tan W, Jiang L, et al. Do psychiatric patients experience more psychiatric symptoms during COVID-19 pandemic and lockdown? A case-control study with service and research implications for immunopsychiatry. *Brain, behavior, and immunity*. 2020.
11. Wang C, Pan R, Wan X, et al. Immediate psychological responses and associated factors during the initial stage of the 2019 coronavirus disease (COVID-19) epidemic among the general population in China. *International journal of environmental research and public health*. 2020;17(5):1729.
12. Brooks SK, Webster RK, Smith LE, et al. The psychological impact of quarantine and how to reduce it: rapid review of the evidence. *The Lancet*. 2020.
13. Zandifar A, Badrfam R. Iranian mental health during the COVID-19 epidemic. *Asian journal of psychiatry*. 2020;51.
14. Cao W, Fang Z, Hou G, et al. The psychological impact of the COVID-19 epidemic on college students in China. *Psychiatry research*. 2020:112934.
15. Roy D, Tripathy S, Kar SK, Sharma N, Verma SK, Kaushal V. Study of knowledge, attitude, anxiety & perceived mental healthcare need in Indian population during COVID-19 pandemic. *Asian Journal of Psychiatry*. 2020:102083.
16. Besedovsky L, Lange T, Born J. Sleep and immune function. *Pflügers Archiv-European Journal of Physiology*. 2012;463(1):121-137.
17. Marshall L, Born J. Brain-immune interactions in sleep. *International review of neurobiology*. 2002;52:93-131.
18. Arjona A, Sarkar DK. Are circadian rhythms the code of hypothalamic-immune communication? Insights from natural killer cells. *Neurochemical research*. 2008;33(4):708-718.

19. Coogan AN, Wyse CA. Neuroimmunology of the circadian clock. *Brain research*. 2008;1232:104-112.
20. Imeri L, Opp MR. How (and why) the immune system makes us sleep. *Nature Reviews Neuroscience*. 2009;10(3):199-210.
21. Prather AA, Janicki-Deverts D, Hall MH, Cohen S. Behaviorally assessed sleep and susceptibility to the common cold. *Sleep*. 2015;38(9):1353-1359.
22. Qualtrics L. Qualtrics [software]. *Utah, USA: Qualtrics*. 2014.
23. Spitzer RL, Kroenke K, Williams JB, Löwe B. A brief measure for assessing generalized anxiety disorder: the GAD-7. *Archives of internal medicine*. 2006;166(10):1092-1097.
24. Mollayeva T, Thurairajah P, Burton K, Mollayeva S, Shapiro CM, Colantonio A. The Pittsburgh sleep quality index as a screening tool for sleep dysfunction in clinical and non-clinical samples: A systematic review and meta-analysis. *Sleep medicine reviews*. 2016;25:52-73.
25. Buysse DJ, Reynolds CF, Monk TH, Berman SR, Kupfer DJ. The Pittsburgh Sleep Quality Index: a new instrument for psychiatric practice and research. *Psychiatry res*. 1989;28(2):193-213.
26. Duncan DT, Park SH, Al-Ajlouni YA, et al. Association of financial hardship with poor sleep health outcomes among men who have sex with men. *SSM-population health*. 2017;3:594-599.
27. Duncan DT, Park SH, Goedel WC, et al. Perceived neighborhood safety is associated with poor sleep health among gay, bisexual, and other men who have sex with men in Paris, France. *Journal of Urban Health*. 2017;94(3):399-407.
28. Millar BM, Parsons JT, Redline S, Duncan DT. What's sleep got to do with it?: Sleep health and sexual risk-taking among men who have sex with men. *AIDS and Behavior*. 2019;23(3):572-579.
29. Ruff RR, Ng J, Jean-Louis G, Elbel B, Chaix B, Duncan DT. Neighborhood stigma and sleep: findings from a pilot study of low-income housing residents in New York City. *Behavioral Medicine*. 2018;44(1):48-53.
30. Watson NF, Badr MS, Belenky G, et al. Joint consensus statement of the American Academy of Sleep Medicine and Sleep Research Society on the recommended amount of sleep for a healthy adult: methodology and discussion. *Sleep*. 2015;38(8):1161-1183.
31. Mountcastle HD, Park SH, Al-Ajlouni YA, et al. Stress levels are associated with poor sleep health among sexual minority men in Paris, France. *Sleep health*. 2018;4(5):436-441.
32. Khassawneh B, Ghazzawi M, Khader Y, et al. Symptoms and risk of obstructive sleep apnea in primary care patients in Jordan. *Sleep and Breathing*. 2009;13(3):227-232.
33. Miles R. Employment and unemployment in Jordan: The importance of the gender system. *World development*. 2002;30(3):413-427.
34. Lancet T. The gendered dimensions of COVID-19. *Lancet (London, England)*. 2020;395(10231):1168.
35. Park EM, Meltzer-Brody S, Stickgold R. Poor sleep maintenance and subjective sleep quality are associated with postpartum maternal depression symptom severity. *Archives of women's mental health*. 2013;16(6):539-547.
36. Boccabella A, Malouf J. How do sleep-related health problems affect functional status according to sex? *Journal of Clinical Sleep Medicine*. 2017;13(05):685-692.



- 1  
2  
3 37. Nakajima M, Dokam A, Kasim AN, Alsoofi M, Khalil NS, al'Absi M. Peer Reviewed:  
4 Habitual Khat and Concurrent Khat and Tobacco Use Are Associated With Subjective  
5 Sleep Quality. *Preventing chronic disease*. 2014;11.  
6  
7 38. Lin P-C, Chen C-H, Pan S-M, et al. Atypical work schedules are associated with poor  
8 sleep quality and mental health in Taiwan female nurses. *International archives of*  
9 *occupational and environmental health*. 2012;85(8):877-884.  
10  
11 39. Sankri-Tarbichi AG. Obstructive sleep apnea-hypopnea syndrome: etiology and  
12 diagnosis. *Avicenna journal of medicine*. 2012;2(1):3.  
13  
14 40. Montgomery E, Foldspang A. Traumatic experience and sleep disturbance in refugee  
15 children from the Middle East. *The European Journal of Public Health*. 2001;11(1):18-  
16 22.  
17  
18 41. Lubans D, Richards J, Hillman C, et al. Physical activity for cognitive and mental health  
19 in youth: a systematic review of mechanisms. *Pediatrics*. 2016;138(3):e20161642.  
20  
21 42. Babic MJ, Smith JJ, Morgan PJ, Eather N, Plotnikoff RC, Lubans DR. Longitudinal  
22 associations between changes in screen-time and mental health outcomes in adolescents.  
23 *Mental Health and Physical Activity*. 2017;12:124-131.  
24  
25 43. Wu X, Tao S, Zhang Y, Zhang S, Tao F. Low physical activity and high screen time can  
26 increase the risks of mental health problems and poor sleep quality among Chinese  
27 college students. *PloS one*. 2015;10(3).  
28  
29 44. Strandh M, Winefield A, Nilsson K, Hammarström A. Unemployment and mental health  
30 scarring during the life course. *The European Journal of Public Health*. 2014;24(3):440-  
31 445.  
32  
33 45. Sadock BJ, Sadock VA. *Kaplan & Sadock's concise textbook of clinical psychiatry*.  
34 Lippincott Williams & Wilkins; 2008.  
35  
36 46. Lustberg L, Reynolds III CF. Depression and insomnia: questions of cause and effect.  
37 *Sleep medicine reviews*. 2000;4(3):253-262.  
38  
39 47. Adrien J. Neurobiological bases for the relation between sleep and depression. *Sleep*  
40 *medicine reviews*. 2002;6(5):341-351.  
41  
42 48. Pace-Schott EF, Hobson JA. The neurobiology of sleep: genetics, cellular physiology and  
43 subcortical networks. *Nature Reviews Neuroscience*. 2002;3(8):591-605.  
44  
45 49. Raison CL, Rutherford RE, Woolwine BJ, et al. A randomized controlled trial of the  
46 tumor necrosis factor antagonist infliximab for treatment-resistant depression: the role of  
47 baseline inflammatory biomarkers. *JAMA psychiatry*. 2013;70(1):31-41.  
48  
49 50. Irwin MR, Wang M, Campomayor CO, Collado-Hidalgo A, Cole S. Sleep deprivation  
50 and activation of morning levels of cellular and genomic markers of inflammation.  
51 *Archives of internal medicine*. 2006;166(16):1756-1762.  
52  
53 51. Fang H, Tu S, Sheng J, Shao A. Depression in sleep disturbance: A review on a  
54 bidirectional relationship, mechanisms and treatment. *Journal of cellular and molecular*  
55 *medicine*. 2019;23(4):2324-2332.  
56  
57 52. Li JZ, Bunney BG, Meng F, et al. Circadian patterns of gene expression in the human  
58 brain and disruption in major depressive disorder. *Proceedings of the National Academy*  
59 *of Sciences*. 2013;110(24):9950-9955.  
60  
61 53. Vats MG, Mahboub BH, Al Hariri H, Al Zaabi A, Vats D. Obesity and sleep-related  
62 breathing disorders in middle east and UAE. *Canadian respiratory journal*. 2016;2016.  
63  
64 54. Johnson EO, Breslau N. Sleep problems and substance use in adolescence. *Drug and*  
65 *alcohol dependence*. 2001;64(1):1-7.

- 1  
2  
3 55. Irwin MR. Why sleep is important for health: a psychoneuroimmunology perspective.  
4 *Annual review of psychology*. 2015;66:143-172.  
5  
6 56. Pūras D, de Mesquita JB, Cabal L, Maleche A, Meier BM. The right to health must guide  
7 responses to COVID-19. *The Lancet*. 2020.  
8  
9  
10  
11  
12  
13  
14  
15  
16  
17  
18  
19  
20  
21  
22  
23  
24  
25  
26  
27  
28  
29  
30  
31  
32  
33  
34  
35  
36  
37  
38  
39  
40  
41  
42  
43  
44  
45  
46  
47  
48  
49  
50  
51  
52  
53  
54  
55  
56  
57  
58  
59  
60

For peer review only

Table 1. Participants' characteristics, anxiety and depression by poor sleep health, N(%)

|                                   | Total         | Poor sleep quality | $p^a$            | Short sleep duration ( $\leq 7$ h) | $p^a$            | Sleep problems | $p^a$            |
|-----------------------------------|---------------|--------------------|------------------|------------------------------------|------------------|----------------|------------------|
| Total                             | 1,240 (100.0) | 222 (17.9)         |                  | 580 (46.8)                         |                  | 790 (63.7)     |                  |
| Age                               |               |                    |                  |                                    |                  |                |                  |
| 18-24                             | 127 (10.2)    | 21 (9.5)           | 0.156            | 37 (6.4)                           | <b>&lt;0.001</b> | 77 (9.8)       | 0.769            |
| 25-29                             | 188 (15.2)    | 46 (20.7)          |                  | 82 (14.1)                          |                  | 126 (16.0)     |                  |
| 30-39                             | 471 (38.0)    | 82 (36.9)          |                  | 226 (39.0)                         |                  | 303 (38.4)     |                  |
| 40-49                             | 271 (21.9)    | 47 (21.2)          |                  | 134 (23.1)                         |                  | 172 (21.8)     |                  |
| $\geq 50$                         | 172 (13.9)    | 26 (11.7)          |                  | 96 (16.6)                          |                  | 106 (13.4)     |                  |
| Missing                           | 11 (0.9)      | 0 (0.0)            |                  | 5 (0.9)                            |                  | 6 (0.8)        |                  |
| Gender                            |               |                    |                  |                                    |                  |                |                  |
| Male                              | 656 (52.9)    | 105 (47.3)         | 0.063            | 285 (49.1)                         | <b>0.012</b>     | 404 (51.1)     | 0.104            |
| Female                            | 583 (47.0)    | 117 (52.7)         |                  | 295 (50.9)                         |                  | 385 (48.7)     |                  |
| Missing                           | 1 (0.1)       | 0 (0.0)            |                  | 0 (0.0)                            |                  | 1 (0.1)        |                  |
| Employment                        |               |                    |                  |                                    |                  |                |                  |
| Employed                          | 673 (54.3)    | 113 (50.9)         | 0.286            | 320 (55.2)                         | <b>0.015</b>     | 418 (52.9)     | 0.155            |
| Self-employed                     | 205 (16.5)    | 36 (16.2)          |                  | 85 (14.7)                          |                  | 131 (16.6)     |                  |
| Student                           | 84 (6.8)      | 13 (5.9)           |                  | 30 (5.2)                           |                  | 49 (6.2)       |                  |
| Unemployed/retired                | 275 (22.2)    | 60 (27.0)          |                  | 145 (25.0)                         |                  | 190 (24.1)     |                  |
| Missing                           | 3 (0.2)       | 0 (0.0)            |                  | 0 (0.0)                            |                  | 2 (0.3)        |                  |
| Region <sup>b</sup>               |               |                    |                  |                                    |                  |                |                  |
| Northern                          | 237 (19.1)    | 45 (20.3)          | 0.767            | 99 (17.1)                          | 0.077            | 152 (19.2)     | 0.535            |
| Central                           | 970 (78.2)    | 170 (76.6)         |                  | 461 (79.5)                         |                  | 614 (77.7)     |                  |
| Southern                          | 33 (2.7)      | 7 (3.2)            |                  | 20 (3.5)                           |                  | 24 (3.0)       |                  |
| Anxiety                           |               |                    |                  |                                    |                  |                |                  |
| Minimal anxiety (0-4)             | 583 (47.0)    | 37 (16.7)          | <b>&lt;0.001</b> | 212 (36.6)                         | <b>&lt;0.001</b> | 292 (37.0)     | <b>&lt;0.001</b> |
| Mild (5-9)                        | 419 (33.8)    | 80 (36.0)          |                  | 205 (35.3)                         |                  | 301 (38.1)     |                  |
| Moderate (10-14)                  | 160 (12.9)    | 60 (27.0)          |                  | 100 (17.2)                         |                  | 128 (16.2)     |                  |
| Severe (15-21)                    | 78 (6.3)      | 45 (20.3)          |                  | 63 (10.9)                          |                  | 69 (8.7)       |                  |
| Difficulties caused by depression |               |                    |                  |                                    |                  |                |                  |
| Not at all                        | 650 (52.4)    | 72 (32.4)          | <b>&lt;0.001</b> | 267 (46.0)                         | <b>&lt;0.001</b> | 369 (46.7)     | <b>&lt;0.001</b> |
| Several days                      | 432 (34.8)    | 91 (41.0)          |                  | 222 (38.3)                         |                  | 305 (38.6)     |                  |

|                    |            |            |                  |            |                  |            |                  |
|--------------------|------------|------------|------------------|------------|------------------|------------|------------------|
| Over half the days | 96 (7.7)   | 34 (15.3)  |                  | 53 (9.1)   |                  | 69 (8.7)   |                  |
| Nearly everyday    | 58 (4.7)   | 25 (11.3)  |                  | 36 (6.2)   |                  | 46 (5.8)   |                  |
| Missing            | 4 (0.3)    | 0 (0.0)    |                  | 2 (0.3)    |                  | 1 (0.1)    |                  |
| Depression         |            |            |                  |            |                  |            |                  |
| Quartile 1 (0-3)   | 333 (26.9) | 12 (5.4)   | <b>&lt;0.001</b> | 117 (20.2) | <b>&lt;0.001</b> | 144 (18.2) | <b>&lt;0.001</b> |
| Quartile 2 (4-6)   | 308 (24.8) | 25 (11.3)  |                  | 132 (22.8) |                  | 188 (23.8) |                  |
| Quartile 3 (7-11)  | 332 (26.8) | 65 (29.3)  |                  | 159 (27.4) |                  | 234 (29.6) |                  |
| Quartile 4 (12-27) | 267 (21.5) | 120 (54.1) |                  | 172 (29.7) |                  | 224 (28.4) |                  |

<sup>a</sup>Chi-square test or Fisher's exact test

<sup>b</sup>Northern region includes Irbid (N=110), Jerash (N=10), Balqa'a (N=3), Zarqa (N=91), Ajloun (N=7), Mafrqa (N=16); Central Region includes Amman (N=925), Madaba (N=19), Salt (N=26); Southern Region includes Tafila (N=2), Karak (N=6), Ma'an (N=6), Aqaba (N=15), and Petra (N=4)

Table 2. Multivariable association (aPRs)<sup>a</sup> between anxiety, depression, and poor sleep health.

|                       | Poor sleep quality    | Short sleep duration (≤7 hours) | Sleep problems      |
|-----------------------|-----------------------|---------------------------------|---------------------|
|                       | aPR (95% CI)          | aPR (95% CI)                    | aPR (95% CI)        |
| <b>Anxiety</b>        |                       |                                 |                     |
| Minimal anxiety (0-4) | Referent              | Referent                        | Referent            |
| Mild (5-9)            | 3.10 (2.15, 4.49)**   | 1.36 (1.18, 1.57)**             | 1.43 (1.29, 1.58)** |
| Moderate (10-14)      | 6.06 (4.17, 8.82)**   | 1.75 (1.49, 2.06)**             | 1.59 (1.42, 1.78)** |
| Severe (15-21)        | 9.24 (6.35, 13.46)**  | 2.25 (1.93, 2.63)**             | 1.76 (1.56, 1.98)** |
| <i>P</i> for trend    | <0.001                | <0.001                          | <0.001              |
| <b>Depression</b>     |                       |                                 |                     |
| Quartile 1 (0-3)      | Referent              | Referent                        | Referent            |
| Quartile 2 (4-6)      | 2.24 (1.15, 4.36)*    | 1.22 (1.01, 1.48)*              | 1.42 (1.21, 1.65)** |
| Quartile 3 (7-11)     | 5.44 (2.98, 9.90)**   | 1.42 (1.18, 1.71)**             | 1.64 (1.42, 1.90)** |
| Quartile 4 (12-27)    | 12.38 (6.98, 21.96)** | 1.90 (1.60, 2.25)**             | 1.95 (1.70, 2.23)** |
| <i>P</i> for trend    | <0.001                | <0.001                          | <0.001              |

<sup>a</sup>Adjusted for age, gender, region, and employment  
aPR=adjusted prevalence ratio; CI=confidence interval  
\*p<0.05; \*\*p<0.001

STROBE Statement—Checklist of items that should be included in reports of *cross-sectional studies*

|                              | Item No | Recommendation                                                                                                                                                                                    | Page No  |
|------------------------------|---------|---------------------------------------------------------------------------------------------------------------------------------------------------------------------------------------------------|----------|
| <b>Title and abstract</b>    | 1       | (a) Indicate the study's design with a commonly used term in the title or the abstract                                                                                                            | 1        |
|                              |         | (b) Provide in the abstract an informative and balanced summary of what was done and what was found                                                                                               | 2        |
| <b>Introduction</b>          |         |                                                                                                                                                                                                   |          |
| Background/rationale         | 2       | Explain the scientific background and rationale for the investigation being reported                                                                                                              | 3        |
| Objectives                   | 3       | State specific objectives, including any prespecified hypotheses                                                                                                                                  | 4        |
| <b>Methods</b>               |         |                                                                                                                                                                                                   |          |
| Study design                 | 4       | Present key elements of study design early in the paper                                                                                                                                           | 4        |
| Setting                      | 5       | Describe the setting, locations, and relevant dates, including periods of recruitment, exposure, follow-up, and data collection                                                                   | 4        |
| Participants                 | 6       | (a) Give the eligibility criteria, and the sources and methods of selection of participants                                                                                                       | 4        |
| Variables                    | 7       | Clearly define all outcomes, exposures, predictors, potential confounders, and effect modifiers. Give diagnostic criteria, if applicable                                                          | 5,6      |
| Data sources/<br>measurement | 8*      | For each variable of interest, give sources of data and details of methods of assessment (measurement). Describe comparability of assessment methods if there is more than one group              | 5,6      |
| Bias                         | 9       | Describe any efforts to address potential sources of bias                                                                                                                                         | 4, 5     |
| Study size                   | 10      | Explain how the study size was arrived at                                                                                                                                                         | -        |
| Quantitative variables       | 11      | Explain how quantitative variables were handled in the analyses. If applicable, describe which groupings were chosen and why                                                                      | 6        |
| Statistical methods          | 12      | (a) Describe all statistical methods, including those used to control for confounding                                                                                                             | 6        |
|                              |         | (b) Describe any methods used to examine subgroups and interactions                                                                                                                               | 6        |
|                              |         | (c) Explain how missing data were addressed                                                                                                                                                       | 6        |
|                              |         | (d) If applicable, describe analytical methods taking account of sampling strategy                                                                                                                | 6        |
|                              |         | (e) Describe any sensitivity analyses                                                                                                                                                             | -        |
| <b>Results</b>               |         |                                                                                                                                                                                                   |          |
| Participants                 | 13*     | (a) Report numbers of individuals at each stage of study—eg numbers potentially eligible, examined for eligibility, confirmed eligible, included in the study, completing follow-up, and analysed | 4        |
|                              |         | (b) Give reasons for non-participation at each stage                                                                                                                                              | 4        |
|                              |         | (c) Consider use of a flow diagram                                                                                                                                                                | -        |
| Descriptive data             | 14*     | (a) Give characteristics of study participants (eg demographic, clinical, social) and information on exposures and potential confounders                                                          | 7, 16-17 |
|                              |         | (b) Indicate number of participants with missing data for each variable of interest                                                                                                               | 7, 16-17 |
| Outcome data                 | 15*     | Report numbers of outcome events or summary measures                                                                                                                                              | 7, 16-17 |

1  
2  
3  
4  
5  
6  
7  
8  
9  
10  
11  
12  
13  
14  
15  
16  
17  
18  
19  
20  
21  
22  
23  
24  
25  
26  
27  
28  
29  
30  
31  
32  
33  
34  
35  
36  
37  
38  
39  
40  
41  
42  
43  
44  
45  
46  
47  
48  
49  
50  
51  
52  
53  
54  
55  
56  
57  
58  
59  
60

|                          |    |                                                                                                                                                                                                              |          |
|--------------------------|----|--------------------------------------------------------------------------------------------------------------------------------------------------------------------------------------------------------------|----------|
| Main results             | 16 | (a) Give unadjusted estimates and, if applicable, confounder-adjusted estimates and their precision (eg, 95% confidence interval). Make clear which confounders were adjusted for and why they were included | 7, 16-17 |
|                          |    | (b) Report category boundaries when continuous variables were categorized                                                                                                                                    | 7, 16-17 |
|                          |    | (c) If relevant, consider translating estimates of relative risk into absolute risk for a meaningful time period                                                                                             | -        |
| Other analyses           | 17 | Report other analyses done—eg analyses of subgroups and interactions, and sensitivity analyses                                                                                                               | 7, 16-17 |
| <b>Discussion</b>        |    |                                                                                                                                                                                                              |          |
| Key results              | 18 | Summarise key results with reference to study objectives                                                                                                                                                     | 8        |
| Limitations              | 19 | Discuss limitations of the study, taking into account sources of potential bias or imprecision. Discuss both direction and magnitude of any potential bias                                                   | 8-10     |
| Interpretation           | 20 | Give a cautious overall interpretation of results considering objectives, limitations, multiplicity of analyses, results from similar studies, and other relevant evidence                                   | 9        |
| Generalisability         | 21 | Discuss the generalisability (external validity) of the study results                                                                                                                                        | 10       |
| <b>Other information</b> |    |                                                                                                                                                                                                              |          |
| Funding                  | 22 | Give the source of funding and the role of the funders for the present study and, if applicable, for the original study on which the present article is based                                                | 11       |

\*Give information separately for exposed and unexposed groups.

**Note:** An Explanation and Elaboration article discusses each checklist item and gives methodological background and published examples of transparent reporting. The STROBE checklist is best used in conjunction with this article (freely available on the Web sites of PLoS Medicine at <http://www.plosmedicine.org/>, Annals of Internal Medicine at <http://www.annals.org/>, and Epidemiology at <http://www.epidem.com/>). Information on the STROBE Initiative is available at [www.strobe-statement.org](http://www.strobe-statement.org).

# BMJ Open

## Anxiety and Depressive Symptoms are Associated with Poor Sleep Health During a Period of COVID-19 Induced Nationwide Lockdown: A Cross-Sectional Analysis of Adults in Jordan

|                                 |                                                                                                                                                                                                                                                                                                                                                                                                                                                                                                                                                                                                                                                             |
|---------------------------------|-------------------------------------------------------------------------------------------------------------------------------------------------------------------------------------------------------------------------------------------------------------------------------------------------------------------------------------------------------------------------------------------------------------------------------------------------------------------------------------------------------------------------------------------------------------------------------------------------------------------------------------------------------------|
| Journal:                        | <i>BMJ Open</i>                                                                                                                                                                                                                                                                                                                                                                                                                                                                                                                                                                                                                                             |
| Manuscript ID                   | bmjopen-2020-041995.R1                                                                                                                                                                                                                                                                                                                                                                                                                                                                                                                                                                                                                                      |
| Article Type:                   | Original research                                                                                                                                                                                                                                                                                                                                                                                                                                                                                                                                                                                                                                           |
| Date Submitted by the Author:   | 28-Sep-2020                                                                                                                                                                                                                                                                                                                                                                                                                                                                                                                                                                                                                                                 |
| Complete List of Authors:       | Al-Ajlouni, Yazan; Cambridge University, Department of Primary Care and Public Health<br>Park, Su Hyun; Columbia University Mailman School of Public Health, Department of Epidemiology<br>Alawa, Jude; University of Cambridge, Institute of Public Health<br>Shamaileh, Ghaith; Tulane University School of Science and Engineering, Department of Cell and Molecular Biology<br>Bawab, Aziz; Presbyterian Hospital<br>El-Sadr, Wafaa M.; ICAP at Columbia University; Columbia University Mailman School of Public Health, Department of Epidemiology<br>Duncan, Dustin; Columbia University Mailman School of Public Health, Department of Epidemiology |
| <b>Primary Subject Heading</b>: | Public health                                                                                                                                                                                                                                                                                                                                                                                                                                                                                                                                                                                                                                               |
| Secondary Subject Heading:      | Public health, Mental health                                                                                                                                                                                                                                                                                                                                                                                                                                                                                                                                                                                                                                |
| Keywords:                       | MENTAL HEALTH, INFECTIOUS DISEASES, SLEEP MEDICINE, PUBLIC HEALTH                                                                                                                                                                                                                                                                                                                                                                                                                                                                                                                                                                                           |
|                                 |                                                                                                                                                                                                                                                                                                                                                                                                                                                                                                                                                                                                                                                             |

SCHOLARONE™  
Manuscripts





I, the Submitting Author has the right to grant and does grant on behalf of all authors of the Work (as defined in the below author licence), an exclusive licence and/or a non-exclusive licence for contributions from authors who are: i) UK Crown employees; ii) where BMJ has agreed a CC-BY licence shall apply, and/or iii) in accordance with the terms applicable for US Federal Government officers or employees acting as part of their official duties; on a worldwide, perpetual, irrevocable, royalty-free basis to BMJ Publishing Group Ltd ("BMJ") its licensees and where the relevant Journal is co-owned by BMJ to the co-owners of the Journal, to publish the Work in this journal and any other BMJ products and to exploit all rights, as set out in our [licence](#).

The Submitting Author accepts and understands that any supply made under these terms is made by BMJ to the Submitting Author unless you are acting as an employee on behalf of your employer or a postgraduate student of an affiliated institution which is paying any applicable article publishing charge ("APC") for Open Access articles. Where the Submitting Author wishes to make the Work available on an Open Access basis (and intends to pay the relevant APC), the terms of reuse of such Open Access shall be governed by a Creative Commons licence – details of these licences and which [Creative Commons](#) licence will apply to this Work are set out in our licence referred to above.

Other than as permitted in any relevant BMJ Author's Self Archiving Policies, I confirm this Work has not been accepted for publication elsewhere, is not being considered for publication elsewhere and does not duplicate material already published. I confirm all authors consent to publication of this Work and authorise the granting of this licence.

Manuscript Word Count: 4100

**Anxiety and Depressive Symptoms are Associated with Poor Sleep Health  
During a Period of COVID-19 Induced Nation-wide Lockdown: A Cross-  
Sectional Analysis of Adults in Jordan**

Yazan A. Al-Ajlouni, BS, MPhil<sup>1, 2</sup>

Su Hyun Park, PhD, MPH<sup>1, 3</sup>

Jude Alawa, BA, MPhil<sup>2</sup>

Ghaith Shamaileh<sup>4</sup>

Aziz Bawab, MD<sup>5</sup>

Wafaa El-Sadr, MD, MPH, MPA<sup>1, 6</sup>

Dustin T. Duncan, ScD<sup>1</sup>

1. Department of Epidemiology, Columbia University Mailman School of Public Health,  
New York, NY USA
2. Cambridge Institute of Public Health, University of Cambridge School of Clinical  
Medicine, Cambridge, United Kingdom
3. Saw Swee Hock School of Public Health, National University of Singapore and  
National University Health System, Singapore
4. Department of Cell and Molecular Biology, Tulane University School of Science and  
Engineering, New Orleans, Louisiana USA
5. NY-Presbyterian Hospital, New York, NY USA
6. ICAP at Columbia University, New York, NY. USA

**Correspondence to:** Yazan A. Al-Ajlouni, BS, MPhil, University of Cambridge School of  
Clinical Medicine, Department of Primary Care and Public Health, Cambridge, United  
Kingdom, CB1 2EW. Tel: (+44) 74233 Email: [ya295@cam.ac.uk](mailto:ya295@cam.ac.uk)

## Abstract

**Background:** Jordan, a Middle Eastern country, declared a state of national emergency due to the novel coronavirus (COVID-19) and a strict nation-wide lockdown on March 17, 2020, banning all travel and movement around the country, potentially impacting mental health. This study sought to investigate the association between mental health (e.g., anxiety and depressive symptoms) and sleep health among a sample of Jordanians living through a state of COVID-19 induced nation-wide lockdown.

**Methods:** Using Facebook, participants (N=1,240) in Jordan in March 2020 were recruited and directed to a web-based survey measuring anxiety (items from GAD-7 instrument), depressive symptoms (items from DES-10), sleep health (items from the PSQI), and sociodemographic. A modified Poisson regression model with robust error variance. Adjusted prevalence ratios (aPRs) and 95% confidence intervals (CIs) were estimated to examine how anxiety and depressive symptoms may affect different dimensions of sleep health: 1) poor sleep quality, 2) short sleep duration, 3) encountering sleep problems.

**Results:** The majority of participants reported having experienced mild (33.8%), moderate (12.9%), or severe (6.3%) levels of anxiety during lockdown, and nearly half of respondents reported depressive symptoms during lockdown. Similarly, over 60 percent of participants reported having experienced at least one sleep problem in the last week, and nearly half reported having had short sleep duration. Importantly, Anxiety was associated with poor sleep health outcomes. For example, corresponding to the dose-response relationship between anxiety and sleep health outcomes, those reporting severe anxiety were the most likely to experience poor sleep quality (aPR = 8.95; 95% CI = 6.12–13.08), short sleep duration (aPR = 2.23; 95% CI = 1.91–2.61), and at least one problem sleep problem (aPR = 1.73; 95% CI = 1.54–1.95). Moreover, depressive symptoms were also associated with poor sleep health outcomes. As compared to scoring in the first quartile, scoring fourth quartile was associated with poor sleep quality (aPR = 11.82; 95% CI = 6.64 – 21.04), short sleep duration (aPR = 1.87; 95% CI = 1.58–2.22), and experiencing at least one sleep problem (aPR = 1.90; 95% CI = 1.66 – 2.18).

**Conclusions:** Increased levels of anxiety and depressive symptoms can negatively influence sleep health among a sample of Jordanian adults living in a state of COVID-19 induced nation-wide lockdown.

### Strengths and Limitations of this study

- This study utilized a relatively large sample for a population that is heavily understudied in public health research, as well as an increased number of exposure and outcome measures compared to the existing research conducted in the region.
- To the best of our knowledge, this is the first study to examine this association among a Middle Eastern population and one of the first to investigate the impact of an extremely strict extended lockdown on health outcomes.

- The reliance of subjective measures for both the exposure and the outcome may have introduced bias.
- The generalizability of the results is an acknowledged concern given that participants were Jordanian using the social media platform, Facebook.

**Keywords:** Coronavirus; COVID-19; Lockdown; Outbreak Control; Mental Health; Sleep Health

For peer review only

## Introduction

On December 31, 2019, a pneumonia of unknown cause was first detected in Wuhan, the largest metropolitan area in China's Hubei province, and was reported to the World Health Organization (WHO) Country Office in China. A month later, the coronavirus (COVID-19) outbreak was declared as a public health emergency of international concern by the WHO. On March 2, 2020, Jordan detected its first COVID-19 case in the country. On March 11, 2020, as the number of COVID-19 cases outside China continued to increase, resulting in over 4,000 deaths at the time, WHO declared the COVID-19 a pandemic.<sup>1,2</sup>

As the COVID-19 pandemic continued to unfold across the world, Jordan began detecting tens of cases, and decided to impose some of the strictest measures to combat an outbreak. On March 14, 2020, a travel ban was issued, and all borders in Jordan were blocked. Few days after, a strict nation-wide lockdown was implemented, and residents were not allowed on the streets<sup>3</sup>. Although lockdown ended in Wuhan, China on April 8, 2020 after 76 days of being implemented<sup>4</sup>, Jordanians continued to live under some of the strictest measures of a lockdown for nearly two months until early May 2020. This included allowing some movement outside households for some days of the week while completely disallowing such movement on other days. Additionally, all parks, restaurants, cafes, and any public open spaces were shut down indefinitely. Groceries were only available through delivery to households, and no cars could be driven on the streets in all regions of the country.

While a lockdown is considered a recommended measure in combating an outbreak, an extended lockdown may have severe effects on people's social lives, mobility, and the overall economy<sup>5</sup>. This includes influencing a set of health outcomes among the general population and could be an activator of stressors, such as anxiety, and several other symptoms of poor mental health<sup>6-9</sup>. In the context of a prolonged strict lockdown measures, large-scale social isolation is also induced among the population. In Jordan, a large proportion of the population is employed in working-class jobs, such as those in the industrial or agricultural sectors, which require manual labor and typically offer low pay. The lockdown has left many Jordanians unemployed and without the daily income they depend on, imposing significant financial stress. For instance, in a report demonstrating the impact of lockdown in Jordan on households across the country, three-quarters of respondents (72.5%), among a sample of 12,084 Jordanian adults, indicated having difficulties covering basic needs (rent, food, heating and medicine) due to the lockdown measures<sup>3</sup>. Additionally, 63.3% indicated that they did not have a source of support in case they run out of food and basic amenities required for survival<sup>3</sup>.

In general, previous research has consistently demonstrated that poor mental health is associated with multiple negative health outcomes, including poor sleep health<sup>6-9</sup>. The *Diagnostic and Statistical Manual of Mental Disorders 5<sup>th</sup> Edition*, widely used by psychiatrists across the globe, lists sleep disturbance as one of the possible symptoms required for the diagnosis of both major depressive disorder and generalized anxiety disorder. Negative mental health outcomes may be heightened in epidemics, such as during the COVID-19 pandemic<sup>10</sup>. For instance, Wang et al. demonstrated that the

1  
2  
3 COVID-19 pandemic and the restriction of freedom during lockdowns has been shown to  
4 have a significant psychological impact related to stress, depression and anxiety<sup>11</sup>.  
5 Additionally, Brooks et al., reported that such psychosocial health outcomes (e.g., stress,  
6 anger, and fear) could be further increased during the state epidemic-induced  
7 lockdowns<sup>12</sup>.  
8

9  
10 Importantly, research has shown that sleep and the circadian system exert a strong  
11 regulatory influence on immune functions<sup>13</sup>. Sleep and the circadian system cooperate  
12 bidirectionally at the systemic and cellular level to organize immune functions intime and  
13 space via neuroendocrine and sympathetic effector mechanisms<sup>14-17</sup>. The relationship  
14 between sleep health and the immune system is particularly of importance during times  
15 of epidemics. For example, Prather et al. showed that among a sample of 164 healthy  
16 men and women, shorter sleep duration, measured behaviorally using actigraphy prior to  
17 viral exposure, was associated with increased susceptibility to the common cold<sup>18</sup>. While  
18 there is a literature on the prevalence of mental health issues during the times of  
19 epidemics<sup>19-24</sup>, as well as its relationship with sleep health among various populations<sup>6-  
20 10,25-27</sup>, few studies have investigated such an association during times of nation-wide  
21 lockdowns<sup>28-30</sup>, especially in the Middle East. Lockdown measures could be effective in  
22 controlling the transmission of infection, such measures could influence other health  
23 outcomes unrelated to their current outbreak, including sleep.  
24  
25

26 In this study, we sought to investigate the associations between mental health issues,  
27 namely anxiety and depressive symptoms, with poor sleep health among a sample of  
28 individuals residing in Jordan during a period of COVID-19 pandemic induced lockdown.  
29 We hypothesized that anxiety and depressive symptoms will be associated with a higher  
30 risk of poor sleep health among a sample of Jordanians, after controlling for demographic  
31 covariates.  
32  
33

## 34 **Methodology**

### 35 ***Data and Study Sample***

36  
37  
38 Facebook, a social media platform, was utilized to recruit a sample of individuals across  
39 Jordan during a period of nation-wide lockdown put in place due to the COVID-19  
40 pandemic outbreak in March 2020. Facebook was the platform of choice given its large  
41 spread among the Jordanian population, with approximately 83.21% of the population  
42 (9,903,802) being active users on Facebook in March 2020<sup>31</sup>. An advertised post was  
43 placed on Facebook targeting Jordanians between the ages of 18 – 65 years old who  
44 were in Jordan for the duration of the last two weeks of March 2020. The post was also  
45 placed by an independent researcher, and snowball sampling was also enabled by  
46 allowing the advertised post to be shared by individuals on Facebook. The survey was  
47 administered through Qualtrics, a platform for survey administration previously used in  
48 health research<sup>32</sup>. The survey was available to participants in both English and Arabic  
49 languages. The survey was originally written in English, and then translated  
50 independently by three bilingual researchers to Arabic. The survey was then piloted for  
51 readability and clarity among both English and Arabic speakers. The post was advertised  
52 for a period of four consecutive days and included assessment of eligibility and a total of  
53 30 items including sociodemographic and measures for various constructs. These  
54  
55  
56  
57  
58  
59  
60

1  
2  
3 included anxiety, depressive symptoms, and sleep health. Measures were taken to avoid  
4 duplicate answers by utilizing the “prevent ballot box stuffing” feature on Qualtrics.  
5 Additionally, internal protocol (IP) addresses associated with responses were reviewed  
6 manually to ensure no duplicates were recorded. On average, the survey took 7 minutes  
7 for completion.  
8  
9

10 Overall, 3,462 participants clicked on the link and were redirected to the survey, of which  
11 2,202 participants were eligible to participant. 22 responses were excluded for being aged  
12 less than 18 years old. Overall, a total of 1,240 full responses were recorded,  
13 corresponding to a completion rate of 56.4% among those deemed eligible.  
14 Approximately two-thirds (67.4%) of the respondents completed the survey in Arabic.  
15 Overall, the completion rate of those who clicked the linked to the survey was 36.5%. All  
16 protocols and procedures were approved by the University of Jordan Hospital Institutional  
17 Review Board prior to data collection.  
18  
19

### 20 *Patient and Public Involvement*

21  
22 No patient involved.  
23  
24

### 25 **Measures**

#### 26 *Anxiety*

27  
28 The General Anxiety Disorder 7-item (GAD-7) scale was used to measure anxiety among  
29 participants. The GAD-7 was developed to diagnose generalized anxiety disorders and  
30 has been validated in 2,740 primary-care patients<sup>33</sup>. Seven items were included in the  
31 survey, and participants' anxiety was determined according to their scoring on the item.  
32 A 7-item questionnaire was utilized where each item asked participants how often, during  
33 the last 2 weeks, they were bothered by a given symptom. Response options were “not  
34 at all,” “several days,” “more than half the days,” and “nearly every day,” scored as 0, 1,  
35 2, and 3, respectively. Scores range from 0 to 21, with four categorizations of anxiety  
36 severity according to the score. Those who score between 0 to 4 were considered to have  
37 minimal anxiety, while those scoring between 5-9, 10-14, and 15-21 were noted to have  
38 mild, moderate, and severe anxiety, respectively. Cronbach's alpha was 0.87, indicating  
39 good internal consistency.  
40  
41  
42  
43

#### 44 *Depressive Symptoms*

45  
46 Ten (10) items were adopted from the Center for Epidemiologic Studies Depression Scale  
47 (CES-D). Those items were chosen to be consistent with cultural concerns regarding the  
48 topic of depression and to be appropriate when translated to the Arabic language.  
49 Response options were “rarely or none of the time (<1 day)”, “some or a little of the time  
50 (1-2 days)”, “occasionally or a moderate amount of time (3-4 days)”, and “most or all of  
51 the time (5-7 days)”, scored as 0,1,2, and 3, respectively. Three items worded in the  
52 positive direction were reverse coded and all items were summed for a total score, with  
53 a possible range of 0-30. During data analysis, the total scores were divided in quartiles:  
54  
55  
56  
57  
58  
59  
60

1  
2  
3 the first quartile (Q1:0-3), the second quartile (Q2:4-6), the third quartile (Q3: 7-11), and  
4 the fourth quartile (Q4:12-27). Cronbach's alpha was 0.8145, indicating good internal  
5 consistency.  
6

### 7 *Sleep Health*

8  
9  
10 Three items were adopted from the Pittsburgh Sleep Quality Index (PSQI), a reliable and  
11 validated tool<sup>34</sup>, and included in the survey to measure for sleep health outcomes: sleep  
12 quality, sleep duration, and experiencing sleep problems. Sleep quality was measured  
13 using the item "During the past month, how would you rate your sleep quality overall?"<sup>35</sup>.  
14 Participants were asked to choose one of four options, including "Very good", "Fairly  
15 good", "Fairly bad", and "Very bad". Consistent with previous research on sleep health<sup>36-</sup>  
16 <sup>39</sup>, the four response options were dichotomized in statistical analysis good sleep quality  
17 (e.g., includes "very good" and "fairly good") and poor sleep quality (e.g., includes "very  
18 bad" and "fairly bad"). To measure sleep duration, we used the question asking, "During  
19 the past month, how many h of actual sleep did you get each night? (This may be different  
20 from the number of hours you spent in bed.)"<sup>35</sup>. Participants then reported their response  
21 in hours as integers with one decimal place allowed (e.g., halves). Short sleep duration  
22 was defined as 7 hours or less<sup>36,40,41</sup>. Finally, sleep problems were assessed by asking  
23 the participants if they experienced any of three sleep-related problems in the past two  
24 weeks (e.g., the period of lock-down). Three statements were presented, and participants  
25 were given a "Yes" or "No" response options. These statements were "1) "I had trouble  
26 sleeping because I could not get to sleep within 30 min." (e.g., problems falling asleep)  
27 2). "I had trouble staying awake while driving, eating meals, or engaging in social activity."  
28 (e.g., problems staying awake in the daytime also known as daytime sleepiness) 3) "I took  
29 medicine (prescribed or "over the counter") to help me sleep".<sup>37</sup>  
30  
31  
32  
33

### 34 *Physical activity*

35  
36 Two items were adopted from the International Physical Activity Questionnaire (IPAQ)  
37 and included in this study. The IPAQ is a well-utilized instrument in health research, and  
38 has been shown to be reliable and valid across different populations<sup>42-44</sup>. The two items  
39 used measured the number of days in which moderate-to-vigorous physical activity  
40 (MVPA) was performed, as well as the duration of time in minutes spent in a given day,  
41 respectively. The reported answers for both items were then multiplied to calculate the  
42 MVPA variable, defined as the duration (in minutes) spent in MVPA per one full week.  
43 The participants were then grouped based on whether they met the World Health  
44 Organization's (WHO) adults physical activity guidelines or not (e.g., 150 minutes or more  
45 of MVPA per week)<sup>45,46</sup>.  
46  
47  
48

### 49 *Sociodemographic*

50  
51 Four items were included to measure demographic variables among participants.  
52 Participants were asked to report their age (in years), gender (male or female),  
53 employment status (employed, self-employed, unemployed, student, or retired), and the  
54 city they currently reside in within Jordan. Cities were grouped into the following regions:  
55  
56  
57  
58  
59  
60



1  
2  
3 Northern region (Irbid, Jerash, Balqa'a, Zarqa, Ajloun, and Mafraq), Central Region  
4 (Amman, Madaba, and Salt), Southern Region (Tafila, Karak, Ma'an, Aqaba, and Petra).  
5

### 6 *Statistical Analysis*

7  
8  
9 Descriptive statistics (frequencies, percentages) were calculated for sociodemographic  
10 characteristics, physical activity, anxiety, and depression according to sleep health  
11 outcomes (e.g., poor sleep quality, short sleep duration, and experiencing sleep  
12 problems). Chi-square or Mann-Whitney U tests were used to examine the differences in  
13 demographic characteristics, physical activity, anxiety, and depression between those  
14 with and without each sleep health outcome.  
15

16  
17 The association between anxiety, depression, and each poor sleep outcome was  
18 assessed using a modified Poisson regression model with robust error variance<sup>47</sup> due to  
19 the high prevalence of the sleep health outcomes<sup>48-53</sup>. The multivariable analysis adjusted  
20 for age, gender, employment status, region and physical activity. Adjusted prevalence  
21 ratios (aPRs) and 95% confidence intervals (CIs) were estimated. Test for p-trend was  
22 calculated by treating the categories of anxiety and depression as continuous variables.  
23 Two-sided  $p < 0.05$  was considered statistically significant. Data were analyzed using  
24 Stata 16.0 (StataCorp, College Station, TX, USA).  
25

### 26 **Results**

27  
28  
29 Table 1 presents the participants sociodemographic characteristics, anxiety, and  
30 depressive symptoms according to sleep health outcomes. The mean age was 37.35 (SD  
31 = 11.01), with over 60% of our sample aged less than 40 years old. The median age of  
32 the sample was 35.0. Approximately half of the sample (52.9%) were males. Additionally,  
33 more than three quarters of the participants reported residing in the Central region  
34 (78.2%), followed by the Northern region (19.1%). Most of the participants were either  
35 employed (54.3%) or self-employed (16.5%), while 17.6% reported being unemployed or  
36 4.6% were retired at the current time. Approximately a third of our sample (31.5%) met  
37 the adult's physical activity guidelines for MVPA of 150 minutes or more per week. In  
38 terms of anxiety, 53% of the participants reported symptoms for mild (33.8%), moderate  
39 (12.9%), or severe anxiety (6.3%) during the period of national lockdown. Furthermore,  
40 approximately a quarter of our sample scored in each of the four quartiles for the  
41 depressive symptoms measures (e.g., 26.9% in the lowest quartile, 24.8% in the second  
42 quartile, 26.8% in the third quartile, and 21.5% in the highest quartile). Finally, and when  
43 measuring for sleep health outcomes, 17.9% of the participants reported poor sleep  
44 quality, 46.8% reported short sleep duration (equal or less than 7 hours of sleep on  
45 average for every night over the past week), while 63.7% reported experiencing at least  
46 one sleep problem over the past week.  
47  
48  
49

50  
51 Multivariable regressions with 95% confidence intervals were calculated to investigate the  
52 relationship between anxiety, depressive symptoms, and sleep health outcomes. The  
53 results, after adjusting for sociodemographic covariates, are presented in Table 2.  
54 Anxiety was associated with poor sleep health outcomes. Results demonstrated a dose-  
55 response relationship, as the aPRs for poor sleep health increased with increasing levels  
56 of both anxiety and depressive symptoms. Compared to those who reported minimal  
57  
58  
59

1  
2  
3 anxiety, participants reporting mild anxiety were more likely to experience poor sleep  
4 quality (aPR = 3.01; 95% CI = 2.07–4.35), short sleep duration (aPR = 1.35; 95%  
5 CI = 1.17–1.56), and at least one problem sleep problem (aPR = 1.41; 95% CI = 1.27–  
6 1.56). Similarly, those reporting moderate anxiety were more likely to experience poor  
7 sleep quality (aPR = 5.78; 95% CI = 3.97 – 8.43), short sleep duration (aPR = 1.73; 95%  
8 CI = 1.47–2.04), and at least one problem sleep problem (aPR = 1.56; 95% CI = 1.39–  
9 1.75) compared to those reporting minimal anxiety. Similarly, and corresponding to the  
10 dose-response relationship between anxiety and sleep health outcomes, those reporting  
11 severe anxiety were the most likely to experience poor sleep quality (aPR = 8.954; 95%  
12 CI = 6.12–13.08), short sleep duration (aPR = 2.23; 95% CI = 1.91–2.61), and at least one  
13 problem sleep problem (aPR = 1.73; 95% CI = 1.54–1.95). P-trend <0.001 for all sleep  
14 outcomes.  
15

16  
17  
18 Depressive symptoms were also associated with poor sleep health outcomes. This  
19 association also demonstrated dose-response relationship. As compared to scoring in  
20 the first quartile, scoring in the second, third, and fourth quartile was significantly  
21 associated with poor sleep quality (aPRs = 2.19, 5.27, and 11.82, respectively), short  
22 sleep duration (aPRs = 1.21, 1.41, and 1.87, respectively), and experiencing at least one  
23 sleep problem (aPRs = 1.40, 1.62, and 1.90, respectively).  
24  
25

## 26 27 **Discussion**

28  
29 This study is the first to empirically explore both mental health and sleep health measures  
30 during nationwide lockdown in response to the COVID-19 pandemic. It is also the first  
31 study to evaluate associations between mental health and sleep health in Jordan, and  
32 one of few studies to address the relationship between these measures among a severely  
33 understudied population; Middle Eastern adults. To the best of our knowledge, there is  
34 only one other study that has assessed sleep health in Jordan, which reported that poor  
35 sleep health, including a high risk of obstructive sleep apnea, snoring, and daytime  
36 sleepiness, was common among Jordanians attending primary care clinics<sup>54</sup>.  
37  
38

39 In our study, the majority of participants reported having experienced mild (33.8%),  
40 moderate (12.9%), or severe (6.3%) levels of anxiety during lockdown, and nearly half of  
41 respondents reported depressive symptoms during lockdown. Similarly, over 60 percent  
42 of participants reported having experienced at least one sleep problem in the last week,  
43 and nearly half reported having had short sleep duration. In addition, we found that  
44 increased levels of reported anxiety or depression were both significantly associated with  
45 an increase in poor sleep health outcomes among Jordanians during lockdown in  
46 response to the COVID-19 pandemic.  
47  
48

49 Our findings that increased levels of self-reported anxiety or depression were significantly  
50 associated with an increase in poor sleep health outcomes can potentially be explained  
51 by the relationship between mental health and sleep health. The pathway by which  
52 depression alters sleep is thought to be through the loss of deep, slow-wave sleep and  
53 an increase in nocturnal arousal. The combination of these two effects contributes to a  
54 decrease in non-REM sleep, which may subsequently result in reduced REM sleep  
55  
56  
57  
58  
59  
60

1  
2  
3 latency<sup>55</sup>. Several studies have shown the association between depression and the  
4 disruption of REM sleep<sup>56,57</sup>. Furthermore, the cause of depression is most commonly  
5 attributed to the dysregulation of monoamines, such as serotonin, dopamine,  
6 norepinephrine, and dopamine. An individual's transition to REM sleep is typically  
7 accompanied by a rapid decrease in these monoamines<sup>58</sup>, and such dysregulation may  
8 be associated with the disruption of REM sleep and the subsequent onset of depressive  
9 symptoms. Research has also demonstrated that depression is correlated with increased  
10 inflammatory markers and that depressive symptoms can be reduced by decreasing that  
11 inflammation<sup>59</sup>. As such, sleep loss has been associated with the increased production of  
12 inflammatory markers, such as C-reactive protein and interleukins<sup>60</sup>. Though the exact  
13 mechanism is not fully understood, there appears to be a relationship between sleep  
14 disturbance, inflammation, and depression<sup>59,61</sup>. Another potential pathway by which  
15 depression and sleep disturbances interact is through alternations in one's circadian  
16 rhythm. An individual's circadian rhythm is crucial to maintaining the sleep-wake cycle,  
17 and it has been observed that depression disrupts circadian rhythm<sup>62</sup>.

21  
22 Overall, our findings suggest the possible impact that economic, social, or health-related  
23 circumstances caused by nation-wide lockdown can have in exacerbating anxiety,  
24 depressive symptoms, and poor sleep health among respondents in Jordan. Particular to  
25 the context of lockdown in response to the COVID-19 pandemic, the Jordanian  
26 government did not provide economic support, financial incentives (e.g., stimulus), or loan  
27 forgiveness schemes to support individuals who may have lost significant portions of their  
28 income or faced additional financial obligations as a result of lockdown and their inability  
29 to engage with their given occupations consistently<sup>3</sup>. As a result, these economic  
30 circumstances may have contributed to increased anxiety, reported depressive  
31 symptoms, and poor sleep health. While it is expected that these economic circumstances  
32 would affect adult men in particular because they are  
33 typically considered financial providers for their families in the context of Jordanian  
34 culture<sup>63</sup>, reported rates of anxiety, depressive symptoms, and poor sleep health were  
35 comparable between male and female respondents. This is the case despite that within  
36 Jordan, a larger proportion of men work outside the home than women. That being said,  
37 because childcare, elderly care, and housework are typically women's responsibilities in  
38 this context, the lockdown restrictions would be expected to disproportionately affect  
39 women's economic resilience, mental well-being, and sleep health, especially given rising  
40 levels of domestic violence and reduced access to sexual and reproductive health  
41 services during lockdown<sup>64,65</sup>. It should be noted that studies have shown that men tend  
42 to have a higher prevalence of sleep disorders such as obstructive sleep apnea, other  
43 studies have found that women are more likely than men to report an increased burden  
44 of depressive symptoms as a result of poor sleep health<sup>66</sup>.

49  
50 Other factors that have been found to affect sleep health and mental health outcomes  
51 that are also expected to be relevant or exacerbated during lockdown situations include  
52 tobacco or khat use, atypical work schedules, and violent or poor familial environments  
53 in households<sup>67-71</sup>. The increased recreational screen time during lockdown spent  
54 watching television, using a computer, or utilizing smartphones and the reality of isolation  
55 with limited social contact would also be expected to contribute to poor mental health

1  
2  
3 outcomes, including anxiety and depressive symptoms, found in our study<sup>71-73</sup>. In  
4 addition, unemployment has been noted to be associated with diminished mental health  
5 and is negatively correlated with sleep health measures<sup>74</sup>. Approximately 25% of  
6 unemployed or retired respondents in our study reported having experienced at least one  
7 sleep problem in the last week and short sleep duration. These risk factors are not only  
8 expected to work in tandem but are also expected to expose underlying vulnerabilities  
9 that also contribute to poor mental health and sleep health<sup>74-76</sup>.

12 When evaluating the potential consequences of lockdown during a pandemic such as  
13 COVID-19, it is critical to consider how lockdown may predispose individuals to risk  
14 factors that impact mental health and sleep health. Poor sleep habits, anxiety, and  
15 depression are all recognized as affecting overall health and contributing to a number of  
16 risk factors for cardiovascular disease, obesity, hypertension, hyperlipidemia, and  
17 diabetes, among other chronic conditions that are increasingly prevalent in Jordan<sup>77</sup>.  
18 Similarly, poor mental health and sleep health are also found to be associated with  
19 excessive alcohol use and substance use<sup>6,78</sup>. Given that poor sleep habits, anxiety, and  
20 depression are also associated with decreased immune responsiveness, it is especially  
21 important to consider how the impacts of nation-wide lockdown on mental health and  
22 sleep health may make individuals particularly vulnerable to SARS-CoV-2, the causative  
23 agent of COVID-19, or other highly infectious pathogens<sup>79</sup>.

27 The study findings, the lack of interventions in place to support the population during strict  
28 lockdowns (e.g., financial incentives, mental health resources), and the absence of  
29 discourse to address poor sleep health or mental health as a result of nation-wide  
30 lockdown highlight a gap in policymaking and planning during health emergencies and  
31 disease outbreaks in Jordan and likely in other countries. While the impact of lockdown  
32 on mental health and sleep health is not expected to be unique to Jordan, future research  
33 should focus on further elucidating the determinants of mental health and poor sleep  
34 health during lockdown and exploring the potential interactive impacts of specific risk  
35 factors that are exacerbated during lockdown on mental health and sleep health and their  
36 subsequent effects on susceptibility to disease. Additionally, the mechanism(s) in which  
37 such association occurs should be investigated. Future attention should also focus on  
38 articulating policies and designing interventions to not only address identified  
39 determinants and risk factors but also to uphold an international standard of individuals'  
40 right to health<sup>80</sup>, especially for vulnerable and disadvantaged populations.

### 44 **Limitations**

46 This study's methodology is subject to several limitations. First, the sample population  
47 only includes individuals utilizing one social media platform, which introduces self-  
48 selection and volunteer bias and limits the generalizability of this study. Second, the  
49 information collected using the online survey includes exclusively self-reported data. As  
50 a result, responses, especially those measuring sleep health and mental health, can be  
51 implicated with decreasing the reliability and/or the validity of the study findings. Third,  
52 because our analysis did not adjust for additional confounding factors, such as substance  
53 use, education, and marital status, residual confounding may have been introduced.

1  
2  
3 However, we note that we utilized a limited survey to increase the survey completion rate.  
4 Finally, given that this study utilizes a cross-sectional survey design, it cannot be used to  
5 analyze mental health and sleep health measures over an extended period of time.  
6 Consequently, causal inference is limited.  
7

## 8 9 **Conclusions**

10  
11 This study provides evidence of reported anxiety and depressive symptoms and their  
12 association with poor sleep health outcomes during lockdown in Jordan in the face of the  
13 COVID-19 pandemic. Our findings draw attention to the potential negative consequences  
14 of lockdown and their impact on sleep health, emphasizing the need for public health  
15 professionals and governments to not only monitor health profiles during lockdown but  
16 also to create interventions aimed at improving sleep health and well-being. More  
17 attention is required to investigate the impacts of lockdown in exacerbating risk factors  
18 for poor mental health and sleep health, and future interventions and policies should be  
19 tailored toward addressing identified risk factors and improving health outcomes in the  
20 context of a nation-wide lockdown.  
21  
22  
23  
24  
25  
26  
27  
28  
29  
30  
31  
32  
33  
34  
35  
36  
37  
38  
39  
40  
41  
42  
43  
44  
45  
46  
47  
48  
49  
50  
51  
52  
53  
54  
55  
56  
57  
58  
59  
60

## Acknowledgments

We thank the participants and the translators of this study. Additionally, we thank Fatih Haloglu for assisting with data cleaning for this study. Additionally, we thank local research assistants from the University of Jordan for assisting with the online data collection.

## Contributorship statement

YAA contributed to the design of this research work. GS was involved in data collection for this project. YAA and SHP was involved in data analysis and interpretation. YAA, SHP, JA, AB, and DTD were involved in drafting the article. WE and DTD provided critical revision of the article. YAA, SHP, JA, GS, AB, WE, and DTD approved the final version of the manuscript.

## Competing interests

Authors Yazan A. Al-Ajlouni, Su Hyun Park, Jude Alawa, Ghaith Shamaileh, Aziz Bawab, Wafaa El-Sadr, and Dustin T. Duncan declare that they have no conflict of interest.

## Funding

The data collection and analyses resulting in this work did not require external funding.

## Data sharing statement

Data are available upon reasonable request. Dataset uploaded into Dryad. DOI Number: DOI:10.5061/dryad.x0k6djhhc

## References

1. Caso V, Federico A. No lockdown for neurological diseases during COVID19 pandemic infection. In: Springer; 2020.
2. WHO Director-General's opening remarks at the media briefing on COVID-19 - 11 March 2020 [press release]. 2020.
3. UNDP Jordan. *Impact of COVID-19 on Households in Jordan*. May 21, 2020 2020.
4. Lee I, Wang C-C, Lin M-C, Kung C-T, Lan K-C, Lee C-T. Effective strategies to prevent coronavirus disease-2019 (COVID-19) outbreak in hospital. *The Journal of Hospital Infection*. 2020.
5. Shrestha AM, Shrestha UB, Sharma R, Bhattarai S, Tran HNT, Rupakheti M. Lockdown caused by COVID-19 pandemic reduces air pollution in cities worldwide. 2020.
6. Kenney SR, Lac A, LaBrie JW, Hummer JF, Pham A. Mental health, sleep quality, drinking motives, and alcohol-related consequences: a path-analytic model. *Journal of Studies on Alcohol and Drugs*. 2013;74(6):841-851.
7. Tsuno N, Besset A, Ritchie K. Sleep and depression. *The Journal of clinical psychiatry*. 2005.
8. Augner C. Associations of subjective sleep quality with depression score, anxiety, physical symptoms and sleep onset latency in young students. *Central European journal of public health*. 2011;19(2):115-117.
9. Duncan DT, Goedel WC, Mayer KH, et al. Poor sleep health and its association with mental health, substance use, and condomless anal intercourse among gay, bisexual, and other men who have sex with men. *Sleep Health*. 2016;2(4):316-321.
10. Hao F, Tan W, Jiang L, et al. Do psychiatric patients experience more psychiatric symptoms during COVID-19 pandemic and lockdown? A case-control study with service and research implications for immunopsychiatry. *Brain, behavior, and immunity*. 2020.
11. Wang C, Pan R, Wan X, et al. Immediate psychological responses and associated factors during the initial stage of the 2019 coronavirus disease (COVID-19) epidemic among the general population in China. *International journal of environmental research and public health*. 2020;17(5):1729.
12. Brooks SK, Webster RK, Smith LE, et al. The psychological impact of quarantine and how to reduce it: rapid review of the evidence. *The Lancet*. 2020.
13. Besedovsky L, Lange T, Born J. Sleep and immune function. *Pflügers Archiv-European Journal of Physiology*. 2012;463(1):121-137.
14. Marshall L, Born J. Brain-immune interactions in sleep. *International review of neurobiology*. 2002;52:93-131.
15. Arjona A, Sarkar DK. Are circadian rhythms the code of hypothalamic-immune communication? Insights from natural killer cells. *Neurochemical research*. 2008;33(4):708-718.
16. Coogan AN, Wyse CA. Neuroimmunology of the circadian clock. *Brain research*. 2008;1232:104-112.
17. Imeri L, Opp MR. How (and why) the immune system makes us sleep. *Nature Reviews Neuroscience*. 2009;10(3):199-210.
18. Prather AA, Janicki-Deverts D, Hall MH, Cohen S. Behaviorally assessed sleep and susceptibility to the common cold. *Sleep*. 2015;38(9):1353-1359.

19. Alexander MJ, Muenzenmaier K. Trauma, addiction, and recovery: Addressing public health epidemics among women with severe mental illness. 1998.
20. Chatterjee K, Chauhan V. Epidemics, quarantine and mental health. *Medical Journal, Armed Forces India*. 2020;76(2):125.
21. Vigo D, Patten S, Pajner K, et al. Mental Health of Communities during the COVID-19 Pandemic. In: SAGE Publications Sage CA: Los Angeles, CA; 2020.
22. Shi L, Lu Z-A, Que J-Y, et al. Prevalence of and risk factors associated with mental health symptoms among the general population in China during the coronavirus disease 2019 pandemic. *JAMA network open*. 2020;3(7):e2014053-e2014053.
23. Pappa S, Ntella V, Giannakas T, Giannakoulis VG, Papoutsis E, Katsaounou P. Prevalence of depression, anxiety, and insomnia among healthcare workers during the COVID-19 pandemic: A systematic review and meta-analysis. *Brain, behavior, and immunity*. 2020.
24. Ćosić K, Popović S, Šarlija M, Kesedžić I. Impact of human disasters and Covid-19 pandemic on mental health: Potential of digital psychiatry. *Psychiatria Danubina*. 2020;32(1):25-31.
25. Zandifar A, Badrfam R. Iranian mental health during the COVID-19 epidemic. *Asian journal of psychiatry*. 2020;51.
26. Cao W, Fang Z, Hou G, et al. The psychological impact of the COVID-19 epidemic on college students in China. *Psychiatry research*. 2020:112934.
27. Roy D, Tripathy S, Kar SK, Sharma N, Verma SK, Kaushal V. Study of knowledge, attitude, anxiety & perceived mental healthcare need in Indian population during COVID-19 pandemic. *Asian Journal of Psychiatry*. 2020:102083.
28. Gualano MR, Lo Moro G, Voglino G, Bert F, Siliquini R. Effects of Covid-19 lockdown on mental health and sleep disturbances in Italy. *International Journal of Environmental Research and Public Health*. 2020;17(13):4779.
29. Huang Y, Zhao N. Generalized anxiety disorder, depressive symptoms and sleep quality during COVID-19 outbreak in China: a web-based cross-sectional survey. *Psychiatry research*. 2020:112954.
30. Zhang C, Yang L, Liu S, et al. Survey of insomnia and related social psychological factors among medical staff involved in the 2019 novel coronavirus disease outbreak. *Frontiers in Psychiatry*. 2020;11:306.
31. Stats Counter. Social Media Stats in Jordan - March 2020. Published 2020. Accessed.
32. Qualtrics L. Qualtrics [software]. *Utah, USA: Qualtrics*. 2014.
33. Spitzer RL, Kroenke K, Williams JB, Löwe B. A brief measure for assessing generalized anxiety disorder: the GAD-7. *Archives of internal medicine*. 2006;166(10):1092-1097.
34. Mollayeva T, Thurairajah P, Burton K, Mollayeva S, Shapiro CM, Colantonio A. The Pittsburgh sleep quality index as a screening tool for sleep dysfunction in clinical and non-clinical samples: A systematic review and meta-analysis. *Sleep medicine reviews*. 2016;25:52-73.
35. Buysse DJ, Reynolds CF, Monk TH, Berman SR, Kupfer DJ. The Pittsburgh Sleep Quality Index: a new instrument for psychiatric practice and research. *Psychiatry res*. 1989;28(2):193-213.
36. Duncan DT, Park SH, Al-Ajlouni YA, et al. Association of financial hardship with poor sleep health outcomes among men who have sex with men. *SSM-population health*. 2017;3:594-599.



- 1  
2  
3 37. Duncan DT, Park SH, Goedel WC, et al. Perceived neighborhood safety is associated  
4 with poor sleep health among gay, bisexual, and other men who have sex with men in  
5 Paris, France. *Journal of Urban Health*. 2017;94(3):399-407.  
6  
7 38. Millar BM, Parsons JT, Redline S, Duncan DT. What's sleep got to do with it?: Sleep  
8 health and sexual risk-taking among men who have sex with men. *AIDS and Behavior*.  
9 2019;23(3):572-579.  
10  
11 39. Ruff RR, Ng J, Jean-Louis G, Elbel B, Chaix B, Duncan DT. Neighborhood stigma and  
12 sleep: findings from a pilot study of low-income housing residents in New York City.  
13 *Behavioral Medicine*. 2018;44(1):48-53.  
14  
15 40. Watson NF, Badr MS, Belenky G, et al. Joint consensus statement of the American  
16 Academy of Sleep Medicine and Sleep Research Society on the recommended amount of  
17 sleep for a healthy adult: methodology and discussion. *Sleep*. 2015;38(8):1161-1183.  
18  
19 41. Mountcastle HD, Park SH, Al-Ajlouni YA, et al. Stress levels are associated with poor  
20 sleep health among sexual minority men in Paris, France. *Sleep health*. 2018;4(5):436-  
21 441.  
22  
23 42. Craig CL, Marshall AL, Sjöström M, et al. International physical activity questionnaire:  
24 12-country reliability and validity. *Medicine & science in sports & exercise*.  
25 2003;35(8):1381-1395.  
26  
27 43. Hagströmer M, Oja P, Sjöström M. The International Physical Activity Questionnaire  
28 (IPAQ): a study of concurrent and construct validity. *Public health nutrition*.  
29 2006;9(6):755-762.  
30  
31 44. Lee PH, Macfarlane DJ, Lam TH, Stewart SM. Validity of the international physical  
32 activity questionnaire short form (IPAQ-SF): A systematic review. *International Journal*  
33 *of Behavioral Nutrition and Physical Activity*. 2011;8(1):115.  
34  
35 45. Tucker JM, Welk GJ, Beyler NK. Physical activity in US adults: compliance with the  
36 physical activity guidelines for Americans. *American journal of preventive medicine*.  
37 2011;40(4):454-461.  
38  
39 46. World Health Organization. Recommended levels of physical activity for adults aged 18 -  
40 64 years. Physical Activity and Adults Web site. Accessed.  
41  
42 47. Zou G. A modified poisson regression approach to prospective studies with binary data.  
43 *American journal of epidemiology*. 2004;159(7):702-706.  
44  
45 48. Behrens T, Taeger D, Wellmann J, Keil U. Different methods to calculate effect  
46 estimates in cross-sectional studies. *Methods of information in medicine*.  
47 2004;43(05):505-509.  
48  
49 49. McNutt L-A, Wu C, Xue X, Hafner JP. Estimating the relative risk in cohort studies and  
50 clinical trials of common outcomes. *American journal of epidemiology*.  
51 2003;157(10):940-943.  
52  
53 50. Thompson ML, Myers J, Kriebel D. Prevalence odds ratio or prevalence ratio in the  
54 analysis of cross sectional data: what is to be done? *Occupational and environmental*  
55 *medicine*. 1998;55(4):272-277.  
56  
57 51. Spiegelman D, Hertzmark E. Easy SAS calculations for risk or prevalence ratios and  
58 differences. *American journal of epidemiology*. 2005;162(3):199-200.  
59  
60 52. skove T, Deddens J, Petersen MR, Endahl L. Prevalence proportion ratios: estimation and  
hypothesis testing. *International journal of epidemiology*. 1998;27(1):91-95.

- 1
- 2
- 3
- 4 53. Halkin A, Reichman J, Schwaber M, Paltiel O, Brezis M. Likelihood ratios: getting
- 5 diagnostic testing into perspective. *QJM: monthly journal of the Association of*
- 6 *Physicians*. 1998;91(4):247-258.
- 7 54. Khassawneh B, Ghazzawi M, Khader Y, et al. Symptoms and risk of obstructive sleep
- 8 apnea in primary care patients in Jordan. *Sleep and Breathing*. 2009;13(3):227-232.
- 9 55. Sadock BJ, Sadock VA. *Kaplan & Sadock's concise textbook of clinical psychiatry*.
- 10 Lippincott Williams & Wilkins; 2008.
- 11 56. Lustberg L, Reynolds III CF. Depression and insomnia: questions of cause and effect.
- 12 *Sleep medicine reviews*. 2000;4(3):253-262.
- 13 57. Adrien J. Neurobiological bases for the relation between sleep and depression. *Sleep*
- 14 *medicine reviews*. 2002;6(5):341-351.
- 15 58. Pace-Schott EF, Hobson JA. The neurobiology of sleep: genetics, cellular physiology and
- 16 subcortical networks. *Nature Reviews Neuroscience*. 2002;3(8):591-605.
- 17 59. Raison CL, Rutherford RE, Woolwine BJ, et al. A randomized controlled trial of the
- 18 tumor necrosis factor antagonist infliximab for treatment-resistant depression: the role of
- 19 baseline inflammatory biomarkers. *JAMA psychiatry*. 2013;70(1):31-41.
- 20 60. Irwin MR, Wang M, Campomayor CO, Collado-Hidalgo A, Cole S. Sleep deprivation
- 21 and activation of morning levels of cellular and genomic markers of inflammation.
- 22 *Archives of internal medicine*. 2006;166(16):1756-1762.
- 23 61. Fang H, Tu S, Sheng J, Shao A. Depression in sleep disturbance: A review on a
- 24 bidirectional relationship, mechanisms and treatment. *Journal of cellular and molecular*
- 25 *medicine*. 2019;23(4):2324-2332.
- 26 62. Li JZ, Bunney BG, Meng F, et al. Circadian patterns of gene expression in the human
- 27 brain and disruption in major depressive disorder. *Proceedings of the National Academy*
- 28 *of Sciences*. 2013;110(24):9950-9955.
- 29 63. Miles R. Employment and unemployment in Jordan: The importance of the gender
- 30 system. *World development*. 2002;30(3):413-427.
- 31 64. Lancet T. The gendered dimensions of COVID-19. *Lancet (London, England)*.
- 32 2020;395(10231):1168.
- 33 65. Park EM, Meltzer-Brody S, Stickgold R. Poor sleep maintenance and subjective sleep
- 34 quality are associated with postpartum maternal depression symptom severity. *Archives*
- 35 *of women's mental health*. 2013;16(6):539-547.
- 36 66. Boccabella A, Malouf J. How do sleep-related health problems affect functional status
- 37 according to sex? *Journal of Clinical Sleep Medicine*. 2017;13(05):685-692.
- 38 67. Nakajima M, Dokam A, Kasim AN, Alsoofi M, Khalil NS, al'Absi M. Peer Reviewed:
- 39 Habitual Khat and Concurrent Khat and Tobacco Use Are Associated With Subjective
- 40 Sleep Quality. *Preventing chronic disease*. 2014;11.
- 41 68. Lin P-C, Chen C-H, Pan S-M, et al. Atypical work schedules are associated with poor
- 42 sleep quality and mental health in Taiwan female nurses. *International archives of*
- 43 *occupational and environmental health*. 2012;85(8):877-884.
- 44 69. Sankri-Tarbichi AG. Obstructive sleep apnea-hypopnea syndrome: etiology and
- 45 diagnosis. *Avicenna journal of medicine*. 2012;2(1):3.
- 46 70. Montgomery E, Foldspang A. Traumatic experience and sleep disturbance in refugee
- 47 children from the Middle East. *The European Journal of Public Health*. 2001;11(1):18-
- 48 22.
- 49
- 50
- 51
- 52
- 53
- 54
- 55
- 56
- 57
- 58
- 59
- 60

- 1  
2  
3 71. Lubans D, Richards J, Hillman C, et al. Physical activity for cognitive and mental health  
4 in youth: a systematic review of mechanisms. *Pediatrics*. 2016;138(3):e20161642.  
5 72. Babic MJ, Smith JJ, Morgan PJ, Eather N, Plotnikoff RC, Lubans DR. Longitudinal  
6 associations between changes in screen-time and mental health outcomes in adolescents.  
7 *Mental Health and Physical Activity*. 2017;12:124-131.  
8 73. Wu X, Tao S, Zhang Y, Zhang S, Tao F. Low physical activity and high screen time can  
9 increase the risks of mental health problems and poor sleep quality among Chinese  
10 college students. *PloS one*. 2015;10(3).  
11 74. Strandh M, Winefield A, Nilsson K, Hammarström A. Unemployment and mental health  
12 scarring during the life course. *The European Journal of Public Health*. 2014;24(3):440-  
13 445.  
14 75. Björklund A, Eriksson T. Unemployment and mental health: evidence from research in  
15 the Nordic countries. *Scandinavian Journal of Social Welfare*. 1998;7(3):219-235.  
16 76. Antillón M, Lauderdale DS, Mullahy J. Sleep behavior and unemployment conditions.  
17 *Economics & Human Biology*. 2014;14:22-32.  
18 77. Vats MG, Mahboub BH, Al Hariri H, Al Zaabi A, Vats D. Obesity and sleep-related  
19 breathing disorders in middle east and UAE. *Canadian respiratory journal*. 2016;2016.  
20 78. Johnson EO, Breslau N. Sleep problems and substance use in adolescence. *Drug and*  
21 *alcohol dependence*. 2001;64(1):1-7.  
22 79. Irwin MR. Why sleep is important for health: a psychoneuroimmunology perspective.  
23 *Annual review of psychology*. 2015;66:143-172.  
24 80. Pūras D, de Mesquita JB, Cabal L, Maleche A, Meier BM. The right to health must guide  
25 responses to COVID-19. *The Lancet*. 2020.  
26  
27  
28  
29  
30  
31  
32  
33  
34  
35  
36  
37  
38  
39  
40  
41  
42  
43  
44  
45  
46  
47  
48  
49  
50  
51  
52  
53  
54  
55  
56  
57  
58  
59  
60

Table 1. Participants’ characteristics, anxiety and depression by poor sleep health, N(%)

|                       | Sleep health, %(n) |                   |                   | Sleep duration, %(n) |                    | Sleep problems, % (n) |                   |
|-----------------------|--------------------|-------------------|-------------------|----------------------|--------------------|-----------------------|-------------------|
|                       | Total              | Poor              | Good              | ≤7 h                 | >6h                | Yes                   | No                |
| Total                 | 1,240 (100.0)      | 222 (17.9)        | 1,018 (82.1)      | 580 (46.8)           | 660 (53.2)         | 790 (63.7)            | 450 (36.3)        |
| Age, median (IQR)     | 35.0 (29.0, 43.0)  | 34.0 (29.0, 42.0) | 36.0 (30.0, 44.0) | 37.0 (30.0, 45.0)    | 35.0 (28.0, 42.0)* | 35.0 (29.0, 43.0)     | 36.0 (29.0, 44.0) |
| Age                   |                    |                   |                   |                      |                    |                       |                   |
| 18-24                 | 127 (10.2)         | 21 (9.5)          | 106 (10.4)        | 37 (6.4)             | 90 (13.6)*         | 77 (9.8)              | 50 (11.1)         |
| 25-29                 | 188 (15.2)         | 46 (20.7)         | 142 (14.0)        | 82 (14.1)            | 106 (16.1)         | 126 (16.0)            | 62 (13.8)         |
| 30-39                 | 471 (38.0)         | 82 (36.9)         | 389 (38.2)        | 226 (39.0)           | 245 (37.1)         | 303 (38.4)            | 168 (37.3)        |
| 40-49                 | 271 (21.9)         | 47 (21.2)         | 224 (22.0)        | 134 (23.1)           | 137 (20.8)         | 172 (21.8)            | 99 (22.0)         |
| ≥50                   | 172 (13.9)         | 26 (11.7)         | 146 (14.3)        | 96 (16.6)            | 76 (11.5)          | 106 (13.4)            | 66 (14.7)         |
| Missing               | 11 (0.9)           | 0 (0.0)           | 11 (1.1)          | 5 (0.9)              | 6 (0.9)            | 6 (0.8)               | 5 (1.1)           |
| Gender                |                    |                   |                   |                      |                    |                       |                   |
| Male                  | 656 (52.9)         | 105 (47.3)        | 551 (54.1)        | 285 (49.1)           | 371 (56.2)*        | 404 (51.1)            | 252 (56.0)        |
| Female                | 583 (47.0)         | 117 (52.7)        | 466 (45.8)        | 295 (50.9)           | 288 (43.6)         | 385 (48.7)            | 198 (44.0)        |
| Missing               | 1 (0.1)            | 0 (0.0)           | 1 (0.1)           | 0 (0.0)              | 1 (0.2)            | 1 (0.1)               | 0 (0.0)           |
| Employment            |                    |                   |                   |                      |                    |                       |                   |
| Employed              | 673 (54.3)         | 113 (50.9)        | 560 (55.0)        | 320 (55.2)           | 353 (53.5)*        | 418 (52.9)            | 255 (56.7)        |
| Self-employed         | 205 (16.5)         | 36 (16.2)         | 169 (16.6)        | 85 (14.7)            | 120 (18.2)         | 131 (16.6)            | 74 (16.4)         |
| Student               | 84 (6.8)           | 13 (5.9)          | 71 (7.0)          | 30 (5.2)             | 54 (8.2)           | 49 (6.2)              | 35 (7.8)          |
| Unemployed/retired    | 275 (22.2)         | 60 (27.0)         | 215 (21.1)        | 145 (25.0)           | 130 (19.7)         | 190 (24.1)            | 85 (18.9)         |
| Missing               | 3 (0.2)            | 0 (0.0)           | 3 (0.3)           | 0 (0.0)              | 3 (0.5)            | 2 (0.3)               | 1 (0.2)           |
| Region <sup>a</sup>   |                    |                   |                   |                      |                    |                       |                   |
| Northern              | 237 (19.1)         | 45 (20.3)         | 192 (18.9)        | 99 (17.1)            | 138 (20.9)         | 152 (19.2)            | 85 (18.9)         |
| Central               | 970 (78.2)         | 170 (76.6)        | 800 (78.6)        | 461 (79.5)           | 509 (77.1)         | 614 (77.7)            | 356 (79.1)        |
| Southern              | 33 (2.7)           | 7 (3.2)           | 26 (2.6)          | 20 (3.5)             | 13 (2.0)           | 24 (3.0)              | 9 (2.0)           |
| Physical activity     |                    |                   |                   |                      |                    |                       |                   |
| MVPA≥150mins          | 391 (31.5)         | 47 (21.2)         | 344 (33.8)*       | 162 (27.9)           | 229 (34.7)*        | 216 (27.3)            | 175 (38.9)*       |
| MVPA<150min           | 849 (68.5)         | 175 (78.8)        | 674 (66.2)        | 418 (72.1)           | 431 (65.3)         | 574 (72.7)            | 275 (61.1)        |
| Anxiety, median (IQR) | 5.0 (3.0, 8.0)     | 9.0 (6.0, 14.0)   | 4.0 (2.0, 7.0)*   | 6.0 (3.0, 10.0)      | 4.0 (2.0, 7.0)*    | 6.0 (3.0, 9.0)        | 3.0 (1.0, 6.0)*   |
| Anxiety               |                    |                   |                   |                      |                    |                       |                   |
| Minimal anxiety (0-4) | 583 (47.0)         | 37 (16.7)         | 546 (53.6)*       | 212 (36.6)           | 371 (56.2)*        | 292 (37.0)            | 291 (64.7)*       |
| Mild (5-9)            | 419 (33.8)         | 80 (36.0)         | 339 (33.3)        | 205 (35.3)           | 214 (32.4)         | 301 (38.1)            | 118 (26.2)        |
| Moderate (10-14)      | 160 (12.9)         | 60 (27.0)         | 100 (9.8)         | 100 (17.2)           | 60 (9.1)           | 128 (16.2)            | 32 (7.1)          |

|                                   |                 |                  |                 |                 |                 |                 |                 |
|-----------------------------------|-----------------|------------------|-----------------|-----------------|-----------------|-----------------|-----------------|
| Severe (15-21)                    | 78 (6.3)        | 45 (20.3)        | 33 (3.2)        | 63 (10.9)       | 15 (2.3)        | 69 (8.7)        | 9 (2.0)         |
| Difficulties caused by depression |                 |                  |                 |                 |                 |                 |                 |
| Not at all                        | 650 (52.4)      | 72 (32.4)        | 578 (56.8)*     | 267 (46.0)      | 383 (58.0)*     | 369 (46.7)      | 281 (62.4)*     |
| Several days                      | 432 (34.8)      | 91 (41.0)        | 341 (33.5)      | 222 (38.3)      | 210 (31.8)      | 305 (38.6)      | 127 (28.2)      |
| Over half the days                | 96 (7.7)        | 34 (15.3)        | 62 (6.1)        | 53 (9.1)        | 43 (6.5)        | 69 (8.7)        | 27 (6.0)        |
| Nearly everyday                   | 58 (4.7)        | 25 (11.3)        | 33 (3.2)        | 36 (6.2)        | 22 (3.3)        | 46 (5.8)        | 12 (2.7)        |
| Missing                           | 4 (0.3)         | 0 (0.0)          | 4 (0.4)         | 2 (0.3)         | 2 (0.3)         | 1 (0.1)         | 3 (0.7)         |
| Depression, median (IQR)          | 6.0 (3.0, 11.0) | 12.0 (8.0, 16.0) | 5.0 (3.0, 9.0)* | 8.0 (4.0, 13.0) | 5.0 (3.0, 9.0)* | 8.0 (4.0, 12.0) | 4.0 (2.0, 8.0)* |
| Depression                        |                 |                  |                 |                 |                 |                 |                 |
| Quartile 1 (0-3)                  | 333 (26.9)      | 12 (5.4)         | 321 (31.5)*     | 117 (20.2)      | 216 (32.7)*     | 144 (18.2)      | 189 (42.0)*     |
| Quartile 2 (4-6)                  | 308 (24.8)      | 25 (11.3)        | 283 (27.8)      | 132 (22.8)      | 176 (26.7)      | 188 (23.8)      | 120 (26.7)      |
| Quartile 3 (7-11)                 | 332 (26.8)      | 65 (29.3)        | 267 (26.2)      | 159 (27.4)      | 173 (26.2)      | 234 (29.6)      | 98 (21.8)       |
| Quartile 4 (12-27)                | 267 (21.5)      | 120 (54.1)       | 147 (14.4)      | 172 (29.7)      | 95 (14.4)       | 224 (28.4)      | 43 (9.6)        |

<sup>a</sup>Northern region includes Irbid (N=110), Jerash (N=10), Balqa'a (N=3), Zarqa (N=91), Ajloun (N=7), Mafrqa (N=16); Central Region includes Amman (N=925), Madaba (N=19), Salt (N=26); Southern Region includes Tafila (N=2), Karak (N=6), Ma'an (N=6), Aqaba (N=15), and Petra (N=4)

MVPA, moderate-to-vigorous physical activity

\*Indicates that significant differences at the 5 percent (0.05) level using a Chi-square test or Mann-Whitney U test.

Table 2. Multivariable association (aPRs)<sup>a</sup> between anxiety, depression, and poor sleep health.

|                       | Poor sleep quality    | Short sleep duration<br>(≤7 hours) | Sleep problems      |
|-----------------------|-----------------------|------------------------------------|---------------------|
|                       | aPR (95% CI)          | aPR (95% CI)                       | aPR (95% CI)        |
| <b>Anxiety</b>        |                       |                                    |                     |
| Minimal anxiety (0-4) | Referent              | Referent                           | Referent            |
| Mild (5-9)            | 3.01 (2.07, 4.35)**   | 1.35 (1.17, 1.56)**                | 1.41 (1.27, 1.56)** |
| Moderate (10-14)      | 5.78 (3.97, 8.43)**   | 1.73 (1.47, 2.04)**                | 1.56 (1.39, 1.75)** |
| Severe (15-21)        | 8.95 (6.12, 13.08)**  | 2.23 (1.91, 2.61)**                | 1.73 (1.54, 1.95)** |
| <i>P</i> for trend    | <0.001                | <0.001                             | <0.001              |
| <b>Depression</b>     |                       |                                    |                     |
| Quartile 1 (0-3)      | Referent              | Referent                           | Referent            |
| Quartile 2 (4-6)      | 2.19 (1.12, 4.27)*    | 1.21 (1.00, 1.47)*                 | 1.40 (1.20, 1.63)** |
| Quartile 3 (7-11)     | 5.27 (2.89, 9.61)**   | 1.41 (1.17, 1.69)**                | 1.62 (1.40, 1.87)** |
| Quartile 4 (12-27)    | 11.82 (6.64, 21.04)** | 1.87 (1.58, 2.22)**                | 1.90 (1.66, 2.18)** |
| <i>P</i> for trend    | <0.001                | <0.001                             | <0.001              |

<sup>a</sup>Adjusted for age, gender, region, employment, and physical activity

aPR=adjusted prevalence ratio; CI=confidence interval

\*p<0.05; \*\*p<0.001

STROBE Statement—Checklist of items that should be included in reports of *cross-sectional studies*

|                              | Item No | Recommendation                                                                                                                                                                                    | Page No  |
|------------------------------|---------|---------------------------------------------------------------------------------------------------------------------------------------------------------------------------------------------------|----------|
| <b>Title and abstract</b>    | 1       | (a) Indicate the study's design with a commonly used term in the title or the abstract                                                                                                            | 1        |
|                              |         | (b) Provide in the abstract an informative and balanced summary of what was done and what was found                                                                                               | 2        |
| <b>Introduction</b>          |         |                                                                                                                                                                                                   |          |
| Background/rationale         | 2       | Explain the scientific background and rationale for the investigation being reported                                                                                                              | 3        |
| Objectives                   | 3       | State specific objectives, including any prespecified hypotheses                                                                                                                                  | 4        |
| <b>Methods</b>               |         |                                                                                                                                                                                                   |          |
| Study design                 | 4       | Present key elements of study design early in the paper                                                                                                                                           | 4        |
| Setting                      | 5       | Describe the setting, locations, and relevant dates, including periods of recruitment, exposure, follow-up, and data collection                                                                   | 4        |
| Participants                 | 6       | (a) Give the eligibility criteria, and the sources and methods of selection of participants                                                                                                       | 4        |
| Variables                    | 7       | Clearly define all outcomes, exposures, predictors, potential confounders, and effect modifiers. Give diagnostic criteria, if applicable                                                          | 5,6      |
| Data sources/<br>measurement | 8*      | For each variable of interest, give sources of data and details of methods of assessment (measurement). Describe comparability of assessment methods if there is more than one group              | 5,6      |
| Bias                         | 9       | Describe any efforts to address potential sources of bias                                                                                                                                         | 4, 5     |
| Study size                   | 10      | Explain how the study size was arrived at                                                                                                                                                         | -        |
| Quantitative variables       | 11      | Explain how quantitative variables were handled in the analyses. If applicable, describe which groupings were chosen and why                                                                      | 6        |
| Statistical methods          | 12      | (a) Describe all statistical methods, including those used to control for confounding                                                                                                             | 6        |
|                              |         | (b) Describe any methods used to examine subgroups and interactions                                                                                                                               | 6        |
|                              |         | (c) Explain how missing data were addressed                                                                                                                                                       | 6        |
|                              |         | (d) If applicable, describe analytical methods taking account of sampling strategy                                                                                                                | 6        |
|                              |         | (e) Describe any sensitivity analyses                                                                                                                                                             | -        |
| <b>Results</b>               |         |                                                                                                                                                                                                   |          |
| Participants                 | 13*     | (a) Report numbers of individuals at each stage of study—eg numbers potentially eligible, examined for eligibility, confirmed eligible, included in the study, completing follow-up, and analysed | 4        |
|                              |         | (b) Give reasons for non-participation at each stage                                                                                                                                              | 4        |
|                              |         | (c) Consider use of a flow diagram                                                                                                                                                                | -        |
| Descriptive data             | 14*     | (a) Give characteristics of study participants (eg demographic, clinical, social) and information on exposures and potential confounders                                                          | 7, 16-17 |
|                              |         | (b) Indicate number of participants with missing data for each variable of interest                                                                                                               | 7, 16-17 |
| Outcome data                 | 15*     | Report numbers of outcome events or summary measures                                                                                                                                              | 7, 16-17 |

|    |                          |    |                                                                                                                                                                                                              |
|----|--------------------------|----|--------------------------------------------------------------------------------------------------------------------------------------------------------------------------------------------------------------|
| 1  |                          |    |                                                                                                                                                                                                              |
| 2  | Main results             | 16 | (a) Give unadjusted estimates and, if applicable, confounder-adjusted estimates and their precision (eg, 95% confidence interval). Make clear which confounders were adjusted for and why they were included |
| 3  |                          |    | 7, 16-                                                                                                                                                                                                       |
| 4  |                          |    | 17                                                                                                                                                                                                           |
| 5  |                          |    |                                                                                                                                                                                                              |
| 6  |                          |    | (b) Report category boundaries when continuous variables were categorized                                                                                                                                    |
| 7  |                          |    | 7, 16-                                                                                                                                                                                                       |
| 8  |                          |    | 17                                                                                                                                                                                                           |
| 9  |                          |    | (c) If relevant, consider translating estimates of relative risk into absolute risk for a meaningful time period                                                                                             |
| 10 |                          |    | -                                                                                                                                                                                                            |
| 11 | Other analyses           | 17 | Report other analyses done—eg analyses of subgroups and interactions, and sensitivity analyses                                                                                                               |
| 12 |                          |    | 7, 16-                                                                                                                                                                                                       |
| 13 |                          |    | 17                                                                                                                                                                                                           |
| 14 | <b>Discussion</b>        |    |                                                                                                                                                                                                              |
| 15 | Key results              | 18 | Summarise key results with reference to study objectives                                                                                                                                                     |
| 16 | Limitations              | 19 | Discuss limitations of the study, taking into account sources of potential bias or imprecision. Discuss both direction and magnitude of any potential bias                                                   |
| 17 |                          |    | 8-10                                                                                                                                                                                                         |
| 18 |                          |    |                                                                                                                                                                                                              |
| 19 | Interpretation           | 20 | Give a cautious overall interpretation of results considering objectives, limitations, multiplicity of analyses, results from similar studies, and other relevant evidence                                   |
| 20 |                          |    | 9                                                                                                                                                                                                            |
| 21 |                          |    |                                                                                                                                                                                                              |
| 22 | Generalisability         | 21 | Discuss the generalisability (external validity) of the study results                                                                                                                                        |
| 23 |                          |    | 10                                                                                                                                                                                                           |
| 24 |                          |    |                                                                                                                                                                                                              |
| 25 | <b>Other information</b> |    |                                                                                                                                                                                                              |
| 26 | Funding                  | 22 | Give the source of funding and the role of the funders for the present study and, if applicable, for the original study on which the present article is based                                                |
| 27 |                          |    | 11                                                                                                                                                                                                           |
| 28 |                          |    |                                                                                                                                                                                                              |
| 29 |                          |    |                                                                                                                                                                                                              |
| 30 |                          |    |                                                                                                                                                                                                              |

\*Give information separately for exposed and unexposed groups.

**Note:** An Explanation and Elaboration article discusses each checklist item and gives methodological background and published examples of transparent reporting. The STROBE checklist is best used in conjunction with this article (freely available on the Web sites of PLoS Medicine at <http://www.plosmedicine.org/>, Annals of Internal Medicine at <http://www.annals.org/>, and Epidemiology at <http://www.epidem.com/>). Information on the STROBE Initiative is available at [www.strobe-statement.org](http://www.strobe-statement.org).
